# Supplementary material for: Canadian high arctic ice core records of organophosphate flame retardants and plasticizers
Source: Royal Society of Chemistry journal article supplement (doi:10.1039/d3em00215b), 2023-01-01
Supplement: d3em00215b1.pdf [file d3em00215b1.pdf]

## SUPPORTING INFORMATION

### **Canadian High Arctic Ice Core Records of Organophosphate Flame Retardants and Plasticizers**

Amila O. De Silva<sup>†\*</sup>, Cora J. Young<sup>‡</sup>, Christine Spencer<sup>†</sup>, Derek C.G. Muir<sup>†</sup>, Martin Sharp<sup>§</sup>, Igor Lehnherr<sup>||</sup>, Alison Criscitiello<sup>§</sup>

<sup>†</sup>Aquatic Contaminants Research Division, Environment Canada, 867 Lakeshore Road, Burlington, ON L7S 1A1, Canada

<sup>‡</sup>Department of Chemistry, York University, Toronto, ON, M3J 1P3, Canada

<sup>§</sup> Department of Earth and Atmospheric Sciences, University of Alberta, Edmonton, AB, T6G 2R3, Canada

<sup>||</sup> Department of Geography, Geomatics and Environment, University of Toronto Mississauga, Mississauga, Ontario L5L 1C6, Canada

#### **Author Information**

amila.desilva@ec.gc.ca; ORCID ID: 0000-0002-5126-8854

youngcj@yorku.ca; ORCID ID: 0000-0002-6908-5829

crisciti@ualberta.ca; ORCID ID: 0000-0002-8741-709X

Christine.spencer0501@gmail.com

derek.muir@ec.gc.ca; ORCID ID: 0000-0001-6631-9776

msharp@ualberta.ca; ORCID ID: 0000-0001-5299-7955

igor.lehnherr@utoronto.ca; ORCID ID: 0000-0002-4618-7128

\*Corresponding authors

## Supporting Information Contents

|                                                                                                         |     |
|---------------------------------------------------------------------------------------------------------|-----|
| Controls and limitations for addressing OPE contamination during field sampling and lab processing..... | S1  |
| UHPLC-MS/MS instrumental analysis of OPE .....                                                          | S3  |
| QA/QC details.....                                                                                      | S7  |
| Detection limits.....                                                                                   | S11 |
| References.....                                                                                         | S27 |

## List of Tables

|                                                                                                                                                 |     |
|-------------------------------------------------------------------------------------------------------------------------------------------------|-----|
| <b>Table S1.</b> List of analytes with details of supplier, mass spectrometry parameters, retention time, and designated internal standard..... | S4  |
| <b>Table S2.</b> Precursor-product ion transition of isotopically labeled standards and supplier.....                                           | S6  |
| <b>Table S3.</b> Federal production volumes in US for OPEs in this study, 2012 and 2020.                                                        | S7  |
| <b>Table S4</b> Recovery of native analytes and internal standards from samples.....                                                            | S10 |
| <b>Table S5.</b> Method detection limits and instrument detection limits.....                                                                   | S11 |
| <b>Table S6.</b> Concentrations (ng/L) of OPEs in sectioned Devon Ice Cap ice core.....                                                         | S12 |
| <b>Table S7.</b> Concentrations (ng/L) of OPEs in sectioned Mt Oxford icefield ice core.....                                                    | S14 |
| <b>Table S8.</b> Correlation matrix for OPE concentrations in Devon Ice Cap core.....                                                           | S16 |
| <b>Table S9</b> Correlation matrix for OPE concentrations in Mt. Oxford core.....                                                               | S17 |
| <b>Table S10.</b> Temporal trend for deposition of OPEs in Devon Ice Cap.....                                                                   | S18 |
| <b>Table S11</b> Correlation matrix for OPEs and particle concentrations in bin classes of 2.4 to 4.5 micron and 4.5 to 10 micron.....          | S19 |

## List of Figures

|                                                                                                                                                                    |     |
|--------------------------------------------------------------------------------------------------------------------------------------------------------------------|-----|
| <b>Figure S1.</b> Major ions measured in 1 cm intervals in firn core expressed as normalized anomaly for a) sodium and chloride and b) magnesium and calcium ..... | S20 |
| <b>Figure S2.</b> Multi-year binned composition of OPEs using concentration in ice cores ...                                                                       | S21 |
| <b>Figure S3.</b> Annual flux (ng m <sup>-2</sup> ) of TCPP, TCEP, and TDCPP in Mt. Oxford icefield core .....                                                     | S22 |
| <b>Figure S4.</b> Air mass density back trajectory for Devon Ice Cap in a) 2001 and b) 2013                                                                        | S23 |
| <b>Figure S5.</b> Air mass density back trajectory for Mt Oxford icefield in a) 2001 and b) 2013.....                                                              | S24 |
| <b>Figure S6.</b> Correlation between TnBP and TCEP in Devon ice core.....                                                                                         | S25 |
| <b>Figure S7</b> Correlation of log transformed a) TNBP b)TCEP with particle concentration in Devon Ice Cap.....                                                   | S26 |

**Controls and limitations for addressing OPE contamination during field sampling and lab processing.** In our experimental design, we took many precautions to avoid contaminating the ice core samples. In the context of OPEs, which are ubiquitous in most commodities, we were particularly concerned with avoiding polymers. The commercially-available ice core drill (Kovacs Mark II coring system, <http://kovacsicedrillingequipment.com/coring-systems/mark-ii/>), does not contain any plastic parts, with the exception of the flight which is on the outside of the barrel and never in contact with the ice core. The inside of the drill barrel, where the ice core enters, is made out of fiberglass. The cutting shoe is made out of aluminum and the cutting teeth are made out of heat treated steel. The drive head is stainless steel and aluminum. More importantly, the entire rind of the core is removed and discarded so that any firm or ice that was touching the inner circumference of the barrel is removed to minimize any contamination.

In addition, we prepared field-exposed blanks consisting of HPLC-grade water in 1 L amber glass bottles that were transported to the field site from Resolute Bay to the Devon Ice Cap and Mt. Oxford icefield and opened in the field during the ice core sampling. These blanks were then shipped back to the lab in Ontario and processed analogously to real samples. The field blanks were compared to “stay” blanks which were the same type of water that had been stored in the lab and never shipped. Our results indicated no contamination arising from the field site activity, however these field blanks have limitations in that they were not handled in a manner identical to the ice core. For example, the field blanks were not in contact with the coring device and were not bagged in the polyethylene tubing for shipment. Probably for this reason, most ice core researchers do not use a field blank as indicated in these ice core studies on pesticides in Austfonna, Svalbard Norway (Hermanson et al. 2005), pesticides in Devon Ice Cap (Zhang et al. 2015), PFAS in Lomonosovfonna, Svalbard (Hartz et al. 2023), pesticides in Lys

glacier, Italy (Villa et al. 2003), lead in Summit, Greenland (McConnell et al. 2002), black carbon in the Tibetan Plateau (Liu et al. 2023), and trace metals in Tupungatito, Chile (Potocki et al., 2022), none of which employ the use of field blanks or any procedural blanks that capture the field sampling and transport processes.

We were not able to eliminate the absolute possibility of polyethylene layflat tubing as a source of OPEs to the ice core, however, based on a weight of evidence, we propose that the plastic tubing was not a major contributor. Polyethylene layflat plastic bags are the standard for transporting ice cores. In our case, 15 to 16 bags were used to ship sections of ice corresponding to 89 to 103 cm lengths per bag. The ice sections were frozen from the time of sampling to shipment and storage. All melting was performed in pre-cleaned 4 L glass bottles. We anticipate the extent of partitioning of OPEs from the plastic bag wrap into the ice core sections to be kinetically and thermodynamically-hindered based on the temperature (-20 to -30 °C) as well as the limited ability of transfer into the solid ice matrix. In addition, results from the Devon Ice Cap ice core indicated exponentially increasing concentrations over the length of the core. We hypothesize that contamination from the plastic wrap into the ice core would have obscured the ability to detect a temporal trend, which is not what we observed. Lastly, the OPE concentrations in the core from the Mt. Oxford icefield were much lower than that observed in the Devon Ice Cap. We used the plastic wrap in both sites for the cores. If the plastic wrap was a significant source of OPEs to the ice, then we'd expect similar results in both locations, which is not what we observed.

The ability to constrain contamination during ice coring is an important area for future study. The challenge is creating a mock ice core sample of the same diameter in an ultra cold environment and then transferring the ice into a layflat plastic tube while remaining in a -20 to -

30 °C environment to mimic that of the actual ice coring location. Future work is warranted to determine contamination, perhaps using simulated field sampling conditions.

**UHPLC-MS/MS instrumental analysis of OPE.** A reverse phase solvent gradient program was applied to separate OPE using a mobile phase based on water (A) and methanol (B) containing 0.1% formic acid. The initial conditions were 95% A and held for 0.1 min and then ramped to 70%B by 1 min, 80% B by 5 min and 100%B by 7 min, followed by a 2 min hold. The gradient then ramped to 40% B at 10 min, and 5% B at 10.5 min. A constant flow rate of 0.3 ml/min was used and an injection volume of 2 ul. An isolator column comprised of a Luna 5 µm octadecylsilyl column with dimensions, 2.1 x 50 mm (Phenomenex, Sacramento, CA, USA) was inserted downstream of the mixing chamber and preceding the injector. The cone and collision energies applied for multiple reaction monitoring transitions are presented in Tables S1&S2.

**Table S1.** List of analytes targeted with abbreviation, CAS #, Full name, Mass spectral precursor ion (m/z) and product ion (m/z), optimized cone and collision energy, internal standard used for relative response quantitation, and name of supplier. Analytes are organized in order of chromatographic retention time (RT, min). \*DIIPP only measured in Mt. Oxford ice core samples.

| name   | Full name                            | CAS                                      | precursor | product | Cone voltage | Collision energy | RT(min) | Internal standard | Supplier   |
|--------|--------------------------------------|------------------------------------------|-----------|---------|--------------|------------------|---------|-------------------|------------|
| TEP    | triethylphosphate                    | 78-40-0                                  | 183.1     | 99.0    | 30           | 16               | 3.22    | d15TEP            | Aldrich    |
|        |                                      |                                          |           | 127.0   |              | 10               |         |                   |            |
| TEEDP  | tetraethylenediphosphonate           | 995-32-4                                 | 303.2     | 173.2   | 42           | 26               | 3.23    | d12TCEP           | Fluka      |
|        |                                      |                                          |           | 219.3   |              | 18               |         |                   |            |
| TCEP   | tris(2-chloroethyl)phosphate         | 115-96-8                                 | 285.1     | 99.2    | 40           | 22               | 3.28    | d12TCEP           | Aldrich    |
|        |                                      |                                          | 287.1     |         |              | 22               |         |                   |            |
| TPPO   | triphenylphosphineoxide              | 791-28-6                                 | 279.2     | 77.2    | 30           | 42               | 3.65    | d15TPPO           | Sigma      |
|        |                                      |                                          |           | 201.3   |              | 26               |         |                   |            |
| TCPP   | tris(2-chloroisopropyl) phosphate    | 13674-84-5                               | 327.1     | 99.0    | 24           | 18               | 3.86    | d18TCPP           | Reidel     |
|        |                                      |                                          | 329.1     |         |              | 22               |         |                   |            |
| TPrP   | tripropylphosphate                   | 513-08-6                                 | 225.1     | 99.0    | 26           | 18               | 3.91    | d21TPrP           | Aldrich    |
|        |                                      |                                          |           | 141.0   |              | 8                |         |                   |            |
| TBPO   | tributylphosphineoxide               | 814-29-9                                 | 219.2     | 91.8    | 35           | 28               | 4.26    | d15TPPO           | Aldrich    |
|        |                                      |                                          |           | 163.2   |              | 25               |         |                   |            |
| TDCPP  | tris(1,3-dichloroisopropyl)phosphate | 13674-87-8                               | 429.1     | 99.1    | 25           | 22               | 4.77    | d15TDCPP          | Reidel     |
|        |                                      |                                          | 431.0     |         |              | 24               |         |                   |            |
| TPP    | triphenylphosphate                   | 115-86-6                                 | 327.1     | 77.2    | 54           | 40               | 4.88    | MTPP              | Wellington |
|        |                                      |                                          |           | 152.3   |              | 44               |         |                   |            |
| TDBrPP | tris(2,3-dibromopropyl)phosphate     | 126-72-7                                 | 696.7     | 99.2    | 50           | 24               | 5.36    | d27TnBP           | Supelco    |
|        |                                      |                                          | 698.7     |         |              | 24               |         |                   |            |
| TiBP   | tri-isobutyl-phosphate               | 126-71-6                                 | 267.3     | 99.2    | 28           | 16               | 5.68    | d27TnBP           | Sigma      |
|        |                                      |                                          |           | 155.2   |              | 8                |         |                   |            |
| TnBP   | tri-n-butyl-phosphate                | 126-73-8                                 | 267.3     | 99.2    | 28           | 16               | 5.85    | d27TnBP           | Aldrich    |
|        |                                      |                                          |           | 155.2   |              | 8                |         |                   |            |
| TBOEP  | tris(2-butoxyethyl) phosphate        | 78-51-3                                  | 399.3     | 199.3   | 6            | 14               | 6.39    | M6TBOEP           | Aldrich    |
|        |                                      |                                          |           | 299.4   |              | 10               |         |                   |            |
| DIIPP* | diphenyl-3-isopropylphenyl phosphate | 69515-46-4,<br>28108-99-8,<br>64532-94-1 | 369.1     | 327.0   | 12           | 20               | 6.89    | d21p-TMPP         | Chiron     |
|        |                                      |                                          |           | 233.0   |              | 26               |         |                   |            |

| name    | Full name                            | CAS                 | precursor | product | Cone voltage | Collision energy | RT(min) | Internal standard | Supplier     |
|---------|--------------------------------------|---------------------|-----------|---------|--------------|------------------|---------|-------------------|--------------|
|         |                                      | 55864-04-5          |           |         |              |                  |         |                   |              |
| oTOTP   | tri-o-tolyl phosphate                | 78-30-8             | 369.3     | 107.2   | 48           | 34               | 6.93    | d21p-TMPP         | Wellington   |
| mp-TOTP | triclesyl phosphate                  | 563-04-2<br>78-32-0 |           | 166.0   | 48           | 30               | 7.08    | d21p-TMPP         | Wellington   |
| TBDPP   | (tert-butylphenyl)diphenyl phosphate | 56803-37-3          | 383.3     | 152.2   | 38           | 44               | 7.37    | d13 BPDP          | Angene       |
|         |                                      |                     |           | 215.2   |              | 36               |         |                   |              |
| EHDPP   | ethylhexyl diphenyl phosphate        | 1241-94-7           | 363.2     | 77.0    | 18           | 40               | 7.57    | d21p-TMPP         | Sigma        |
|         |                                      |                     |           | 251.2   |              | 20               |         |                   |              |
| iDeDPP  | isodecyldiphenyl phosphate           | 29761-21-5          | 391.4     | 251.2   | 16           | 12               | 8.15    | d21p-TMPP         | Accustandard |
| TXP     | trixylyl phosphate                   | 25155-23-1          | 411.3     | 179.3   | 90           | 44               | 8.24    | d27 TXP           | Wellington   |
|         |                                      |                     |           | 194.3   |              | 30               |         |                   |              |
| T2IPP   | tris(2-isopropylphenyl) phosphonate  | 64532-95-2          | 453.3     | 327.3   | 15           | 30               | 8.36    | d33 p-TIPP        | Wellington   |
|         |                                      |                     |           | 369.4   |              | 18               |         |                   |              |
| DTBPP   | (ditertbutylphenyl)phenylphosphate   | 65652-41-7          | 439.4     | 327.2   | 30           | 28               | 8.37    | d33 p-TIPP        | Angene       |
|         |                                      |                     |           | 383.3   |              | 18               |         |                   |              |
| DOPP    | dioctylphenyl phosphonate            | 1754-47-8           | 383.3     | 141.2   | 25           | 48               | 8.74    | d33 p-TIPP        | Aldrich      |
|         |                                      |                     |           | 159.2   |              | 16               |         |                   |              |
| TTBPP   | tris(p-tert-Butylphenyl) phosphate   | 78-33-1             | 495.4     | 327.2   | 92           | 36               | 8.92    | d33 p-TIPP        | Angene       |
|         |                                      |                     |           | 439.4   |              | 22               |         |                   |              |
| TEHP    | Tris(2-ethylhexyl)phosphate          | 78-42-2             | 435.4     | 71.1    | 34           | 10               | 9.28    | d51TEHP IS        | Aldrich      |
|         |                                      |                     |           | 99.0    |              | 10               |         |                   |              |

**Table S2. List of isotopically labeled standards used along with precursor, product ions, cone voltage, collision energy, retention time (min), and supplier.**

| Acronym    | Full name                                                       | Precursor (m/z) | Product ion (m/z) | Cone V   | Collision energy | Retention time | Supplier       |
|------------|-----------------------------------------------------------------|-----------------|-------------------|----------|------------------|----------------|----------------|
| d15TEP     | Tri-ethyl phosphate-d15                                         | 198.3           | 102.1<br>134.0    | 30       | 18<br>12         | 3.21           | Wellington     |
| d12TCEP    | Tris(2-chloroethyl) phosphate-d12                               | 297.0<br>299.3  | 232.1<br>67.2     | 40<br>40 | 10<br>22         | 3.27           | Wellington     |
| d15TPPO    | Triphenyl-d15-phosphine oxide                                   | 294.2           | 211.0             | 26       | 28               | 3.61           | Aldrich        |
| d18TCPP    | tris(2-chloroisopropyl) phosphate d18                           | 347.2           | 102.1             | 24       | 20               | 3.82           | CIL            |
| d21TPrP    | Tri-n-propyl phosphate-d21                                      | 246.3           | 102.1             | 28       | 20               | 3.86           | CDN            |
| d15TDCPP   | Tris(1,3-dichloro-2-propyl) phosphate-d15                       | 446.0           | 102.1             | 25       | 25               | 4.71           | Wellington     |
| MTPP       | <sup>13</sup> C <sub>18</sub> -Triphenylphosphate               | 345.3           | 83.2              | 54       | 39               | 4.87           | Wellington     |
| d27TnBP    | Tri-n-butyl phosphate-d27                                       | 294.4           | 102.2             | 34       | 18               | 5.7            | Wellington     |
| M6TBOEP    | Tris(2-butoxy-[ <sup>13</sup> C <sub>2</sub> ]-ethyl) phosphate | 405.3           | 201.3<br>303.4    | 6        | 14<br>12         | 6.4            | Wellington     |
| d21pTMPP   | Tris-p-tolyl phosphate-d21                                      | 390.2           | 97.9<br>173.8     | 48       | 36<br>54         | 7.03           | Chiron         |
| d13 BPDP   | 4-tert-Butylphenyldiphenyl phosphate-d13                        | 396.1           | 155.1<br>332.1    | 38       | 34<br>20         | 7.33           | Chiron         |
| d27 TXP    | Tris(2,4-dimethylphenyl) phosphate-d27                          | 438.2           | 189.7<br>207.5    | 80       | 46<br>32         | 8.16           | Chiron         |
| d33 p-TIPP | Tris(4-isopropylphenyl) phosphate-d33                           | 486.4           | 342.1<br>390.2    | 74       | 34<br>26         | 8.55           | Chiron         |
| d51TEHP    | Tris(2-ethylhexyl) Phosphate-d51                                | 486.8           | 102.1             | 34       | 10               | 9.22           | Sustainable GR |



**Table S3.** National Federal Production Volume in US according to 2012 and 2020 USEPA CDR Database (<https://www.epa.gov/chemical-data-reporting/access-cdr-data#2020>); As per United States guidelines, data reported in pounds (lbs)<sup>§</sup>; \*CBI = confidential business information, data is not released

| name                | 2012 per year chemical production volume in lbs <sup>§</sup> | 2020 Per year chemical production volume in lbs <sup>§</sup> | CAS        |
|---------------------|--------------------------------------------------------------|--------------------------------------------------------------|------------|
| TEP                 | 1-10 M (i.e. 1,000,000-10,000,000)                           | 1-10 M (i.e. 1,000,000-10,000,000)                           | 78-40-0    |
| TPPO                | <1 M                                                         | <1 M                                                         | 791-28-6   |
| TCPP                | 10 – <50 M                                                   | 20 – <100 M                                                  | 13674-84-5 |
| TDCPP               | 10 – <50 M                                                   | 1 – <20 M                                                    | 13674-87-8 |
| TPHP                | 1 – <10 M                                                    | 1 – <10 M                                                    | 115-86-6   |
| TiBP                | <1 M                                                         | <1 M                                                         | 126-71-6   |
| TnBP                | 1– <10 M                                                     | 1– <10 M                                                     | 126-73-8   |
| TBOEP               | 1 – <10 M                                                    | 1 – <20 M                                                    | 78-51-3    |
| TBDPP               | 1 – <20 M                                                    | 1 – <20 M                                                    | 56803-37-3 |
| EHDPP               | 1 – <20 M                                                    | 1 – <20 M                                                    | 1241-94-7  |
| iDeDPP              | 1 – <20 M                                                    | 1 – <20 M                                                    | 29761-21-5 |
| TXP                 | 1 – <20 M                                                    | 1 – <20 M                                                    | 25155-23-1 |
| DTBPP               | 1 – <20 M                                                    | 1 – <20 M                                                    | 65652-41-7 |
| TTBPP               | <1 M                                                         | <1 M                                                         | 78-33-1    |
| TEHP                | 1 – <20 M                                                    | 1 – <20 M                                                    | 78-42-2    |
| TCEP                | 79,364                                                       | CBI*                                                         | 115-96-8   |
| Tricresyl phosphate | 263,591                                                      | Not listed                                                   | 78-32-0    |
| TEEDP               | Not listed                                                   | Not listed                                                   | 995-32-4   |
| TPrP                | Not listed                                                   | Not listed                                                   | 513-08-6   |
| TBPO                | Not listed                                                   | Not listed                                                   | 814-29-9   |
| TDBrPP              | Not listed                                                   | Not listed                                                   | 126-72-7   |
| DIPIPP*             | Not listed                                                   | Not listed                                                   | 69515-46-4 |
| T2IPP               | Not listed                                                   | Not listed                                                   | 64532-95-2 |
| DOPP                | Not listed                                                   | Not listed                                                   | 1754-47-8  |

<sup>§</sup>Conversion to SI units: 1 M lbs is approximately 450 000 kg; 10 M lbs is approximately 4 500 000 kg, 20 M lbs is

approximately 9 100 000 kg, 50 M lbs is approximately 23 000 000 kg, 100 M lbs is approximately 45 000 000 kg, 79 364

lbs is approximately 36 000 kg, 263 591 lbs is approximately 120 000 kg.

### Details on QA/QC.

*Precision.* Twelve samples corresponding to the years 2014, 2013, 2008, 2002, 2000, 1997,

1996, 1993, 1990, 1989, 1988, and 1983, were extracted and analyzed in duplicate to ascertain

precision of the method. The percent difference was generally within 30% (mean  $\pm$  standard error  $26 \pm 2.4\%$ , range 11-35%) Table S4.

*Extraction efficiency and recovery.* After aliquoting 500 ml (and in some cases duplicate 500 ml) of melted firn for OPE analysis in the Devon Ice Cap samples, the remaining melted sample in the 4 L melt bottle was subsampled and combined. This was deemed a large volume composite melted firn sample that was used for testing recovery and extraction efficiency. The extraction efficiency was evaluated for Devon Ice Cap samples by spiking a cocktail of native and isotopically labeled internal standards into a composite melted ice core sample prior to extraction. The same experiment was conducted with the exception of spiking the native standards post-extraction into the final extract. The ratio of peak areas in the pre-extraction spiked sample and the post-extraction spiked sample corresponds to extraction efficiency (%). The calculated concentration in the pre-extraction spiked sample was compared to the theoretical spike and is expressed as the internal standard-normalized recovery. The spiking level of native standard corresponded to 10 ng/ml in the final extract. For TCPP and TBOEP, the background concentration was much higher than the spiking level and therefore, recovery is best estimated using the extraction efficiency of the native standards, which is a comparison of peak area instead of ng/ml concentration as well as the recovery using the isotopically labeled standards. The results indicate at least 80% extraction efficiency for the majority of the standards supporting the completeness of the extraction method (Table S4). For most analytes, the extraction efficiency was  $> 70\%$  but for certain substances the extraction efficiency was 30-60% indicating a diminished affinity for the SPE sorbent. This is a challenge in isolating these analytes from the sample, however, the use of these isotopically labeled standards inherently corrects for recovery issues as demonstrated by the internal standard normalized concentration

recovery. In addition, the area of the isotopically labeled standards in the full suite of samples was compared to the calibration standards and is expressed as an average  $\pm$  standard deviation (Table S4). Deviation from 100% for the isotopically labeled standards is a combination of extraction efficiency but also matrix effects.

**Table S4.** Recovery of native analytes spiked into sample prior to extraction using internal standard normalized concentration (ng/ml recovery %) and extraction efficiency (EE)<sup>1</sup>, precision as evaluated using % difference on 11 paired samples<sup>2</sup>, and external recovery of isotopically labeled standards in samples compared to calibration curve

|                           | <b>TEP</b>   | <b>TBPO</b>  | <b>TPrP</b>   | <b>TnBP</b> | <b>TiBP</b>   | <b>TDBPP</b> | <b>TPPO</b> | <b>TCEP</b> | <b>TEEDP</b> | <b>TCPP</b>   | <b>TDCPP</b> | <b>TPP</b>   |             |
|---------------------------|--------------|--------------|---------------|-------------|---------------|--------------|-------------|-------------|--------------|---------------|--------------|--------------|-------------|
| ng/ml recovery (%)        | 98           | 89           | 88            | 108         | 74            | 132          | 96          | 71          | 115          | NA            | 93           | 96           |             |
| EE (%) <sup>1</sup>       | 29           | 80           | 52            | 88          | 106           | 82           | 85          | 95          | 97           | 87            | 92           | 87           |             |
| % difference <sup>2</sup> | 15           | NA           | NA            | 11          | 27            | NA           | 35          | 15          | NA           | 33            | 32           | 33           |             |
| ± sd                      | ±4.6         |              |               | ±3.1        | ±4.7          |              | ±4.3        | ±2.9        |              | ±8.5          | ±4.5         | ±8.5         |             |
|                           | <b>EHDPP</b> | <b>oTOTP</b> | <b>mpTOTP</b> | <b>DOPP</b> | <b>iDeDPP</b> | <b>TBOEP</b> | <b>TXP</b>  | <b>TEHP</b> | <b>DTBPP</b> | <b>T2iPPP</b> | <b>TTBPP</b> | <b>TBDPP</b> | <b>DIPI</b> |
| ng/ml recovery (%)        | 74           | 87           | 98            | 94          | 61            | NA           | 111         | 102         | 83           | 72            | 133          | 98           | 102         |
| EE                        | 59           | 56           | 58            | 36          | 40            | 94           | 37          | 46          | 41           | 39            | 46           | 50           | 58          |
| % difference              | 22           | 28           | 27            | NA          | 28            | 33           | NA          | NA          | 33           | 24            | NA           | NA           | NA          |
| ± standard deviation      | ±5.6         | ±5.6         | ±4.4          |             | ±5.9          | ±5.5         |             |             | ±6.3         | ±5.7          |              |              |             |

*Recovery of isotopically labeled standards in samples compared to calibration curve (based on peak area):*

|                    | <b>d<sub>15</sub>TEP</b> | <b>d<sub>21</sub>TPrP</b> | <b>d<sub>27</sub>TnBP</b> | <b>d<sub>15</sub>TPPO</b> | <b>d<sub>12</sub>TCEP</b> | <b>d<sub>18</sub>TCPP</b> | <b>d<sub>15</sub>TDCPP</b> | <b>MTPP</b> | <b>M6TBOEP</b> | <b>d<sub>27</sub>2,4TX<br/>P</b> | <b>d<sub>51</sub>TEHP</b> | <b>d<sub>33</sub>pTIPP</b> |
|--------------------|--------------------------|---------------------------|---------------------------|---------------------------|---------------------------|---------------------------|----------------------------|-------------|----------------|----------------------------------|---------------------------|----------------------------|
| Average            | 50                       | 62                        | 70                        | 92                        | 87                        | 82                        | 93                         | 84          | 84             | 38                               | 36                        | 38                         |
| Standard deviation | ±13                      | ±13                       | ±9                        | ±3                        | ±6                        | ±5                        | ±6                         | ±4          | ±5             | ±6                               | ±7                        | ±7                         |

$$EE = \frac{\text{peak area}_{\text{native spiked into sample before extraction}}}{\text{peak area}_{\text{native spiked into final extract}}} \times 100\%$$

<sup>1</sup>Extraction efficiency (EE) defined as

<sup>2</sup> There were 11 samples with significant melt volume to allow duplicate extraction of 500 ml subsamples. % difference in concentration was determined for each pair and the average ± standard deviation is reported, n= 11; NA = not available when detection frequency was too low to calculate a % difference between replicates.

*Method and instrumental detection limits.* All samples were blank corrected using the mean extraction blank. The mean blank levels corresponded to 0.19 ng/ml TEP, 0.13 ng/ml TnBP, 0.067 ng/ml TiBP, 0.38 ng/ml TCEP, 0.47 ng/ml TCPP, 0.39 ng/ml TDCPP, 0.22 ng/ml TPP, 1.8 ng/ml TBOEP, and 0.052 ng/ml iDeDPP. The method detection limit (MDL) was designated as 3 x standard deviation of extraction blanks and corresponded to 0.092 ng/L TEP, 0.081 ng/L TnBP, 0.031 ng/L TiBP, 0.22 ng/L TCEP, 0.49 ng/L TCPP, 0.22 ng/L TDCPP, 0.12 ng/L TPP, 0.36 ng/L isoDeDPP, and 0.58 ng/L TBOEP (Table S5). Several analytes did not have a signal in the method blanks: TBPO, TPrP, TPPO, and TEEDP. For these analytes, the MDL corresponded to the instrument detection limit (IDL). The IDL corresponded to the concentration yielding a signal to noise ratio of 3 (Table S5).

**Table S5.** Method detection limits using method blanks and instrument detection limits based on signal to noise in instrument response. Units correspond to sample concentration based on a 0.5 ml extract volume and 0.5 L sample volume.

|        | MDL(ng/L) | IDL(ng/L) |        | MDL(ng/L) | IDL(ng/L) |
|--------|-----------|-----------|--------|-----------|-----------|
| TEP    | 0.092     | 0.12      | TOTP   |           | 0.0062    |
| TnBP   | 0.081     | 0.013     | TXP    |           | 0.0010    |
| TiBP   | 0.031     | 0.025     | TBDPP  |           | 0.0430    |
| TCEP   | 0.22      | 0.19      | DTBPPP |           | 0.0031    |
| TCPP   | 0.49      | 0.043     | iDeDPP | 0.052     | 0.0271    |
| TDCPP  | 0.22      | 0.066     | DOPP   |           | 0.0072    |
| TPP    | 0.12      | 0.022     | TTBPP  |           | 0.0062    |
| iDeDPP | 0.36      | 0.0044    | TEHP   | 0.0169    | 0.0026    |
| TBOEP  | 0.58      | 0.039     | DIPIPP |           | 0.0069    |
| TDBrPP | 0.035     | 0.017     |        |           |           |
| TBPO   |           | 0.023     |        |           |           |
| TPrP   |           | 0.036     |        |           |           |
| TPPO   |           | 0.051     |        |           |           |
| TEEDP  |           | 0.015     |        |           |           |
| EHDPP  |           | 0.027     |        |           |           |
| T2iPPP |           | 0.0017    |        |           |           |

**Table S6. Concentrations (ng/L) of OPEs in sectioned Devon Ice Cap ice core with assigned year, depth in centimeters of ice (not water equivalent) and melted volume (continued on next page). Note:2015 concentrations represent 5.5 months of accumulation.**

| assigned year | depth (cm) | Melted volume (ml) | TEP | TBPO | TnBP | TIBP | TDBPP | TPPO  | TCEP | TEEDP | TCPP | TDCPP | TPP | EHDP | TOTP  | DOPP | iDeDPP | TBOEP | TXP   | TEHP  | DTBPPP | T2IPPP | TTBPP | TBDPP |
|---------------|------------|--------------------|-----|------|------|------|-------|-------|------|-------|------|-------|-----|------|-------|------|--------|-------|-------|-------|--------|--------|-------|-------|
| 2015          | 37         | 735                | 19  | <LOD | 44   | 1.4  | <LOD  | 0.83  | 31   | 0.23  | 158  | 12    | 29  | 1.15 | 0.31  | <LOD | 2.3    | 24    | <LOD  | 0.11  | 0.15   | 0.13   | <LOD  | 0.42  |
| 2014          | 81         | 1659               | 26  | <LOD | 31   | 1.3  | <LOD  | 0.93  | 23   | 0.23  | 159  | 9.0   | 36  | 0.70 | 0.30  | 2.6  | 2.2    | 17    | 0.023 | 0.033 | 0.046  | 0.46   | <LOD  | 0.14  |
| 2013          | 128        | 999                | 18  | <LOD | 30   | 1.4  | <LOD  | 0.78  | 17   | 0.49  | 150  | 6.1   | 517 | 0.57 | 0.42  | <LOD | 0.99   | 9.0   | 0.036 | 0.044 | 0.55   | 7.7    | 2.5   | 3.5   |
| 2012          | 162        | 809                | 15  | <LOD | 22   | 0.75 | <LOD  | 1.3   | 13   | <LOD  | 67   | 8.5   | 24  | 0.48 | 0.12  | <LOD | 1.7    | 11    | <LOD  | <LOD  | 0.048  | 0.58   | <LOD  | <LOD  |
| 2011          | 183        | 505                | 8.4 | <LOD | 21   | 1.0  | <LOD  | 2.2   | 10   | 0.095 | 573  | 4.5   | 48  | 0.43 | 0.25  | <LOD | 0.98   | 23    | 0.004 | <LOD  | 0.14   | 0.72   | <LOD  | 0.30  |
| 2010          | 221        | 1005               | 13  | <LOD | 24   | 0.86 | <LOD  | 1.4   | 11   | 0.13  | 58   | 6.0   | 37  | 0.39 | 1.1   | 4.4  | 0.65   | 12    | <LOD  | <LOD  | <LOD   | 0.32   | <LOD  | <LOD  |
| 2009          | 256        | 1012               | 13  | <LOD | 12   | 0.65 | <LOD  | 1.2   | 7.2  | <LOD  | 16   | 4.6   | 5.5 | 0.42 | 0.17  | <LOD | 0.58   | 6.6   | 0.007 | 0.015 | 0.038  | 0.04   | <LOD  | 0.096 |
| 2008          | 293        | 1518               | 12  | <LOD | 28   | 1.0  | <LOD  | 1.8   | 18   | 0.053 | 42   | 4.2   | 15  | 0.71 | 0.19  | <LOD | 1.6    | 11    | 0.007 | 0.051 | 0.051  | 0.14   | <LOD  | 0.071 |
| 2007          | 336        | 794                | 9.3 | <LOD | 18   | 0.58 | <LOD  | 1.6   | 9.8  | <LOD  | 79   | 2.2   | 18  | 1.9  | 0.13  | <LOD | 2.3    | 5.4   | 0.008 | 0.004 | 0.061  | 0.26   | <LOD  | <LOD  |
| 2006          | 357        | 504                | 14  | <LOD | 13   | 0.86 | <LOD  | 1.7   | 9.9  | <LOD  | 25   | 4.3   | 4.2 | 0.38 | 0.12  | <LOD | 0.84   | 46    | 0.063 | <LOD  | 0.040  | <LOD   | <LOD  | <LOD  |
| 2005          | 393        | 1220               | 12  | <LOD | 10   | 0.89 | <LOD  | 0.30  | 4.3  | <LOD  | 13   | 2.8   | 17  | 0.31 | 0.064 | 5.6  | 0.47   | 13    | 0.026 | 0.008 | <LOD   | 0.20   | <LOD  | <LOD  |
| 2004          | 420        | 1161               | 4.9 | 0.15 | 13   | 0.62 | <LOD  | 0.30  | 8.8  | 0.18  | 56   | 6.9   | 55  | 0.54 | 0.14  | 5.5  | 0.79   | 11    | <LOD  | 0.072 | 0.021  | 0.64   | <LOD  | <LOD  |
| 2003          | 448        | 1185               | 9.9 | <LOD | 7.0  | 0.80 | <LOD  | 0.59  | 4.2  | <LOD  | 13   | 1.7   | 6.9 | 0.16 | 0.040 | <LOD | 0.30   | 5.7   | 0.031 | <LOD  | 0.025  | 0.099  | <LOD  | <LOD  |
| 2002          | 505        | 1483               | 12  | 0.27 | 17   | 0.79 | <LOD  | 0.16  | 8.3  | 0.047 | 32   | 4.3   | 4.9 | 0.36 | 0.14  | <LOD | 0.30   | 15    | 0.021 | 0.009 | 0.051  | <LOD   | <LOD  | 0.17  |
| 2001          | 553        | 1470               | 6.8 | 0.21 | 13   | 0.61 | <LOD  | 0.42  | 7.2  | 0.36  | 10   | 5.1   | 3.8 | 0.20 | 0.070 | <LOD | 0.077  | 24    | 0.010 | 0.013 | <LOD   | <LOD   | <LOD  | 0.055 |
| 2000          | 600        | 1292               | 8.2 | 0.49 | 14   | 0.90 | <LOD  | 0.34  | 5.9  | 0.38  | 579  | 7.0   | 45  | 0.16 | 0.10  | <LOD | 0.23   | 11    | 0.011 | 0.009 | 0.043  | 0.56   | 0.14  | 0.074 |
| 1999          | 620        | 884                | 5.2 | <LOD | 13   | 0.68 | <LOD  | 0.60  | 8.6  | 0.12  | 12   | 6.1   | 4.8 | 0.48 | 0.11  | <LOD | 0.53   | 17    | 0.109 | <LOD  | 0.12   | 0.025  | <LOD  | <LOD  |
| 1998          | 669        | 625                | 4.7 | <LOD | 14   | 0.76 | <LOD  | 0.34  | 8.8  | <LOD  | 9    | 5.6   | 6.6 | 0.37 | 0.089 | <LOD | 0.51   | 13    | 0.008 | <LOD  | 0.098  | 0.006  | <LOD  | <LOD  |
| 1997          | 711        | 1422               | 5.5 | <LOD | 12   | 0.77 | <LOD  | 0.74  | 5.8  | 0.18  | 28   | 4.7   | 7.2 | 0.30 | 0.076 | <LOD | 0.31   | 6.3   | 0.030 | <LOD  | 0.079  | 0.069  | <LOD  | <LOD  |
| 1996          | 755        | 1199               | 4.0 | <LOD | 13   | 0.61 | <LOD  | 0.49  | 9.1  | <LOD  | 24   | 3.0   | 20  | 0.29 | 0.086 | <LOD | 0.31   | 5.8   | 0.032 | <LOD  | 0.096  | 0.27   | <LOD  | <LOD  |
| 1995          | 789        | 972                | 2.6 | <LOD | 8.2  | 0.29 | <LOD  | 0.070 | 4.1  | <LOD  | 13   | 1.7   | 3.9 | 0.16 | 0.094 | <LOD | 0.16   | 7.8   | 0.029 | <LOD  | 0.028  | 0.013  | <LOD  | <LOD  |
| 1993          | 878        | 1316               | 2.8 | <LOD | 6.2  | 0.29 | <LOD  | 0.063 | 3.3  | 0.071 | 15   | 1.4   | 17  | 0.10 | 0.047 | <LOD | 0.16   | 5.0   | 0.027 | <LOD  | 0.029  | 0.28   | <LOD  | <LOD  |
| 1992          | 934        | 1940               | 9.7 | 0.20 | 11   | 0.47 | <LOD  | 0.086 | 5.0  | <LOD  | 18   | 1.9   | 13  | 0.33 | 0.062 | 4.2  | 0.11   | 9.5   | <LOD  | <LOD  | <LOD   | 0.095  | <LOD  | <LOD  |
| 1991          | 974        | 1012               | 5.0 | 0.14 | 6.4  | 0.38 | <LOD  | 0.11  | 3.5  | 0.057 | 6.7  | 1.9   | 8.7 | 0.26 | 0.057 | <LOD | 0.25   | 7.6   | 0.007 | 0.021 | 0.019  | 0.055  | 0.023 | 0.17  |

| assigned year | depth (cm) | Melted volume (ml) | TEP | TBPO | TnBP | TiBP | TDBPP | TPPO | TCEP | TEEDP | TCPP | TDCPP | TPP | EHDP | TOTP  | DOPP | iDeDPP | TBOEP | TXP   | TEHP  | DTBPPP | T2iPPP | TTBPP | TBDPP |
|---------------|------------|--------------------|-----|------|------|------|-------|------|------|-------|------|-------|-----|------|-------|------|--------|-------|-------|-------|--------|--------|-------|-------|
| 1990          | 1016       | 1352               | 11  | 0.13 | 7.7  | 0.63 | <LOD  | 0.53 | 4.8  | 0.056 | 15   | 1.8   | 6.9 | 0.33 | 0.10  | <LOD | 0.17   | 8.1   | 0.002 | 0.022 | 0.048  | 0.036  | <LOD  | <LOD  |
| 1989          | 1176       | 1473               | 6.2 | 0.39 | 7.4  | 0.57 | <LOD  | 1.7  | 5.6  | 0.038 | 16   | 3.0   | 9.4 | 0.35 | 0.089 | 1.9  | 0.17   | 13    | 0.028 | <LOD  | 0.025  | 0.089  | <LOD  | <LOD  |
| 1988          | 1096       | 1013               | 5.1 | 0.26 | 5.4  | 0.40 | <LOD  | 1.6  | 3.7  | 0.093 | 18   | 2.4   | 15  | 0.50 | 0.065 | 2.1  | 0.17   | 7.6   | 0.007 | 0.008 | 0.003  | 0.007  | 0.003 | <LOD  |
| 1987          | 1136       | 1525               | 4.1 | 0.29 | 7.5  | 0.24 | <LOD  | 1.6  | 4.5  | 0.086 | 43   | 3.1   | 22  | 0.45 | 0.085 | 4.4  | 0.10   | 6.7   | 0.025 | <LOD  | <LOD   | 0.30   | <LOD  | <LOD  |
| 1986          | 1169       | 1004               | 3.0 | <LOD | 6.3  | 0.67 | <LOD  | 0.17 | 3.6  | 1.1   | 3.8  | 1.6   | 1.8 | 0.23 | 0.042 | <LOD | 0.20   | 8.3   | 0.012 | 0.028 | 0.027  | <LOD   | <LOD  | <LOD  |
| 1985          | 1208       | 1226               | 2.9 | <LOD | 5.6  | 0.33 | <LOD  | 1.2  | 4.5  | 0.14  | 12   | 2.6   | 14  | 0.82 | 0.053 | <LOD | 0.18   | 6.7   | 0.026 | <LOD  | 0.057  | 0.16   | <LOD  | <LOD  |
| 1984          | 1235       | 829                | 14  | <LOD | 6.7  | 0.54 | <LOD  | 0.33 | 6.3  | <LOD  | 43   | 2.0   | 28  | 0.45 | 0.11  | <LOD | 0.37   | 14    | 0.037 | <LOD  | 0.14   | 0.55   | <LOD  | <LOD  |
| 1983          | 1285       | 996                | 8.4 | <LOD | 5.7  | 0.40 | <LOD  | 0.16 | 4.0  | 0.23  | 37   | 3.4   | 8.5 | 0.38 | 0.10  | <LOD | 0.18   | 18    | 0.008 | 0.018 | 0.11   | 0.22   | 0.011 | 0.11  |
| 1982          | 1328       | 1367               | 5.0 | <LOD | 8.8  | 0.59 | <LOD  | 0.26 | 4.3  | 0.24  | 7.1  | 2.8   | 7.2 | 0.41 | 0.15  | <LOD | 0.24   | 6.2   | 0.029 | 0.039 | 0.10   | 0.15   | 0.086 | 0.33  |
| 1981          | 1359       | 1004               | 3.8 | <LOD | 5.3  | 0.28 | <LOD  | 0.18 | 3.0  | 0.057 | 5.0  | 4.4   | 4.0 | 0.20 | 0.10  | <LOD | 0.16   | 7.1   | 0.023 | <LOD  | 0.11   | 0.22   | <LOD  | <LOD  |
| 1980          | 1387       | 1010               | 9.4 | 0.26 | 8.5  | 0.65 | <LOD  | 1.0  | 5.3  | 0.078 | 11   | 3.1   | 16  | 0.26 | 0.076 | 5.5  | 0.11   | 14    | 0.061 | <LOD  | <LOD   | 0.19   | <LOD  | <LOD  |
| 1979          | 1397       | 1015               | 2.9 | <LOD | 8.4  | 0.90 | <LOD  | 6.7  | 6.0  | 0.052 | 22   | 2.5   | 6.2 | 1.2  | 0.080 | <LOD | 0.21   | 6.2   | <LOD  | <LOD  | 0.13   | <LOD   | <LOD  | <LOD  |

**Table S7. Concentrations (ng/L) of OPEs in sectioned Mt. Oxford ice core with assigned year, depth in centimeters of ice (not water equivalent) and melted volume (continued on next page). Note: Concentration in 2017 only includes 5.5 months of accumulation.**

| assigned year | depth (cm) | melt volume (ml) | TEP  | TBPO | TnBP | TiBP | TDBPP | TPPO  | TCEP | TEEDP | TCPP | TDCPP | TPP  | EHDP | O-TOTP | M,P-TOTP | DOPP | IDEDP | TBOEP | T35DMPP | TEHP | DTBPP | T2iPPP | TTBPP  | TBDPP | DIPIP |
|---------------|------------|------------------|------|------|------|------|-------|-------|------|-------|------|-------|------|------|--------|----------|------|-------|-------|---------|------|-------|--------|--------|-------|-------|
| 2017          | 8          | 144              | 10   | <LOD | 15   | 14   | <LOD  | <LOD  | 20   | 0.11  | 96   | 9.6   | 5.2  | 3.6  | <LOD   | 2.8      | <LOD | 1.8   | 75    | <LOD    | 2.2  | 1.3   | 0.25   | 0.24   | 1.4   | 0.085 |
| 2016          | 41         | 600              | 6.3  | <LOD | 6.8  | 26   | <LOD  | 0.35  | 3.0  | <LOD  | 52   | 6.9   | 6.8  | 5.3  | <LOD   | 12       | <LOD | 2.2   | 55    | <LOD    | 1.9  | 1.2   | 0.12   | 0.36   | 2.0   | 0.14  |
| 2015          | 64         | 564              | 4.6  | <LOD | 4.3  | 19   | <LOD  | 0.25  | 7.4  | 0.038 | 38   | 5.4   | 5.3  | 2.9  | <LOD   | 1.0      | <LOD | 0.82  | 34    | <LOD    | 0.81 | 0.47  | 0.050  | 0.12   | 0.85  | 0.081 |
| 2014          | 89         | 445              | 7.2  | <LOD | 4.1  | 9.2  | <LOD  | 0.19  | 8.4  | 0.084 | 39   | 4.6   | 4.0  | 2.2  | <LOD   | 0.76     | <LOD | 1.0   | 41    | <LOD    | 0.79 | 0.21  | 0.047  | 0.076  | 0.50  | 0.052 |
| 2013          | 133        | 1215             | 4.1  | <LOD | 2.2  | 10   | <LOD  | 0.12  | 5.8  | <LOD  | 60   | 3.6   | 2.6  | 2.4  | 0.61   | 0.69     | <LOD | 1.2   | 34    | <0.24   | 1.1  | 0.36  | 0.059  | 0.083  | 1.2   | 0.042 |
| 2012          | 163        | 835              | 3.6  | <LOD | 3.1  | 14   | <LOD  | 0.12  | 7.1  | 0.030 | 38   | 3.9   | 2.5  | 2.2  | <LOD   | <LOD     | <LOD | 1.4   | 24    | <LOD    | 0.86 | 0.15  | 0.072  | 0.043  | 0.41  | 0.048 |
| 2011          | 196        | 1186             | 3.4  | <LOD | 2.3  | 6.3  | <LOD  | 0.39  | 5.1  | <LOD  | 34   | 3.0   | 1.3  | 1.7  | <LOD   | <LOD     | <LOD | 0.45  | 17    | <LOD    | 0.55 | 0.10  | <LOD   | <LOD   | 0.28  | 0.020 |
| 2010          | 227        | 699              | 1.5  | <LOD | 3.1  | 15   | <LOD  | 0.23  | 5.2  | <LOD  | 106  | 3.8   | 1.6  | 1.8  | <LOD   | <LOD     | <LOD | 0.52  | 30    | <LOD    | 0.77 | 0.13  | 0.055  | 0.050  | 0.31  | 0.025 |
| 2009          | 282        | 1099             | 2.3  | <LOD | 2.2  | 15   | <LOD  | 0.11  | 4.0  | <LOD  | 44   | 17    | 1.9  | 2.9  | <LOD   | 0.40     | <LOD | 0.90  | 27    | <LOD    | 0.54 | 0.12  | 0.053  | 0.036  | 0.41  | 0.057 |
| 2008          | 324        | 1062             | <LOD | <LOD | 2.2  | 14   | <LOD  | 0.15  | <LOD | <LOD  | 25   | 1.9   | 1.5  | 1.7  | <LOD   | <LOD     | <LOD | 0.52  | 23    | <LOD    | 0.41 | 0.11  | 0.039  | <LOD   | 0.30  | 0.019 |
| 2007          | 353        | 682              | 0.72 | <LOD | 2.1  | 3.7  | <LOD  | 0.18  | 3.3  | <LOD  | 182  | 2.5   | 1.7  | 1.4  | <LOD   | 0.34     | <LOD | 0.79  | 14    | <LOD    | 0.64 | 0.13  | 0.65   | <LOD   | 0.24  | 0.025 |
| 2006          | 387        | 791              | 2.5  | <LOD | 1.8  | 9.1  | <LOD  | 0.15  | 1.9  | <LOD  | 39   | 2.1   | 1.7  | 1.9  | <LOD   | <LOD     | <LOD | 0.59  | 20    | <LOD    | 0.52 | 0.11  | 0.049  | <LOD   | 0.32  | 0.028 |
| 2005/06       | 413        | 709              | 0.58 | <LOD | 3.2  | 0.77 | <LOD  | 0.11  | 0.53 | <LOD  | 7.4  | 0.96  | 0.76 | 0.59 | <LOD   | <LOD     | <LOD | 0.24  | 3.9   | <LOD    | 0.37 | 0.090 | <LOD   | <LOD   | <LOD  | 0.009 |
| 2004          | 447        | 742              | 2.4  | <LOD | 3.3  | 8.7  | <LOD  | 0.68  | 5.5  | <LOD  | 43   | 8.3   | 3.0  | 2.4  | <LOD   | <LOD     | <LOD | 0.91  | 25    | <LOD    | 0.36 | 0.13  | 0.37   | 0.040  | 0.45  | 0.040 |
| 2003          | 492        | 1299             | 3.4  | <LOD | 1.7  | 5.0  | <LOD  | 0.24  | 3.7  | 0.020 | 21   | 3.0   | 1.7  | 1.5  | <LOD   | <LOD     | <LOD | 0.53  | 12    | <LOD    | 0.34 | 0.083 | 0.044  | <LOD   | 0.33  | 0.041 |
| 2002          | 519        | 788              | 8.8  | <LOD | 3.1  | 8.7  | <LOD  | 0.27  | 3.7  | <LOD  | 55   | 4.2   | 2.8  | 2.9  | <LOD   | 0.83     | <LOD | 2.3   | 26    | <LOD    | 0.72 | 0.16  | 0.049  | <LOD   | 0.51  | 0.048 |
| 2001          | 545        | 835              | 5.5  | <LOD | 3.3  | 15   | <LOD  | 1.0   | 5.1  | <LOD  | 47   | 4.2   | 1.5  | 3.6  | <LOD   | <LOD     | <LOD | 0.96  | 41    | <LOD    | 0.77 | 0.40  | 0.039  | 0.039  | 0.52  | 0.029 |
| 2000          | 589        | 1287             | 3.1  | <LOD | 1.9  | 6.5  | <LOD  | 0.25  | 3.5  | <LOD  | 27   | 4.1   | 1.1  | 1.6  | <LOD   | <LOD     | <LOD | 0.65  | 15    | <LOD    | 0.42 | 0.13  | 0.048  | <LOD   | 0.22  | 0.009 |
| 1999          | 619        | 845              | 3.9  | <LOD | 3.3  | 5.8  | <LOD  | 0.36  | 4.8  | 0.13  | 27   | 3.1   | 2.0  | 1.7  | <LOD   | <LOD     | <LOD | 0.98  | 16    | <LOD    | 0.48 | 0.14  | <LOD   | <LOD   | 0.29  | 0.025 |
| 1998          | 661        | 1305             | 4.4  | 0.26 | 1.7  | 7.4  | <LOD  | 0.10  | 3.2  | <LOD  | 34   | 2.6   | 1.1  | 1.1  | 2.6    | 0.48     | <LOD | 0.59  | 24    | <0.24   | 0.71 | 0.10  | <LOD   | 0.004  | 0.27  | 0.023 |
| 1997          | 687        | 790              | <3.7 | <LOD | 3.5  | 7.8  | <LOD  | 0.073 | 0.77 | 0.023 | 18   | 3.0   | 1.1  | 1.5  | <LOD   | <LOD     | <LOD | 0.47  | 20    | <LOD    | 0.34 | 0.17  | 0.077  | 0.043  | 0.42  | 0.024 |
| 1996          | 731        | 1456             | 3.9  | <LOD | 2.5  | 4.2  | <LOD  | 0.098 | 2.6  | <LOD  | 38   | 2.9   | 0.99 | 1.1  | 5.7    | 0.69     | <LOD | 0.39  | 19    | <0.24   | 0.29 | 0.060 | <LOD   | <0.030 | 0.35  | 0.016 |
| 1995          | 774        | 1321             | 4.3  | <LOD | 2.8  | 5.1  | <LOD  | <LOD  | 2.6  | <LOD  | 25   | 2.1   | 5.2  | 1.3  | 5.2    | 0.70     | <LOD | 1.1   | 21    | <0.24   | 0.33 | 0.093 | <LOD   | <0.030 | 0.37  | 0.027 |
| 1994          | 804        | 955              | 0.61 | <LOD | 3.8  | 3.8  | <LOD  | 0.071 | 0.75 | <LOD  | 5.7  | 1.4   | 0.88 | 1.2  | <LOD   | <LOD     | <LOD | 0.24  | 11    | <LOD    | 0.21 | 0.078 | <LOD   | <LOD   | <LOD  | 0.007 |



| assigned year | depth (cm) | melt volume (ml) | TEP | TBPO  | TnBP | TiBP | TDBPP | TPPO  | TCEP | TEEDP | TCPP | TDCPP | TPP  | EHDP | O-TOTP | M,P-TOTP | DOPP | IDEDP | TBOEP | T35DMP | TEHP | DTBPP | T2iPPP | TTBPP | TBDPP | DIPIP |
|---------------|------------|------------------|-----|-------|------|------|-------|-------|------|-------|------|-------|------|------|--------|----------|------|-------|-------|--------|------|-------|--------|-------|-------|-------|
| 1993          | 837        | 1025             | 1.3 | <LOD  | 1.8  | 8.5  | <LOD  | 0.29  | 0.45 | <LOD  | 12   | 3.8   | 0.89 | 1.5  | <LOD   | <LOD     | <LOD | 0.28  | 21    | <LOD   | 0.31 | 0.094 | 0.32   | <LOD  | 0.26  | 0.017 |
| 1992          | 877        | 1215             | 1.8 | <LOD  | 2.6  | 14   | <LOD  | 0.19  | 1.8  | <LOD  | 44   | 2.3   | 1.4  | 3.2  | <LOD   | 0.27     | <LOD | 0.78  | 30    | <LOD   | 0.45 | 0.15  | 0.039  | 0.024 | 0.41  | 0.018 |
| 1991          | 927        | 1648             | 2.3 | 0.094 | 4.2  | 7.4  | <LOD  | 0.072 | 3.0  | <LOD  | 38   | 2.4   | 1.8  | 1.4  | 8.1    | 0.91     | <LOD | 1.00  | 19    | 0.30   | 0.34 | 0.27  | <LOD   | 0.12  | 0.51  | 0.020 |
| 1990          | 957        | 933              | 2.7 | <LOD  | 3.1  | 5.8  | <LOD  | 0.11  | 3.3  | <LOD  | 13   | 2.1   | 1.0  | 1.1  | <LOD   | <LOD     | <LOD | 0.29  | 13    | <LOD   | 0.22 | 0.11  | <LOD   | <LOD  | 0.18  | 0.005 |
| 1989          | 987        | 927              | 3.3 | <LOD  | 3.2  | 5.2  | <LOD  | <LOD  | 2.9  | <LOD  | 30   | 2.4   | 1.0  | 1.1  | <LOD   | <LOD     | <LOD | 0.31  | 3.7   | <LOD   | 0.19 | 0.11  | <LOD   | <LOD  | 0.27  | <LOD  |
| 1988          | 1011       | 947              | 4.3 | <LOD  | 2.4  | 4.6  | <LOD  | 0.14  | 3.3  | <LOD  | 29   | 7.3   | 1.3  | 1.2  | <LOD   | <LOD     | <LOD | 0.28  | 6.3   | <LOD   | 0.22 | 0.14  | <LOD   | <LOD  | <LOD  | 0.010 |
| 1987          | 1057       | 1542             | 2.6 | <LOD  | 1.6  | 3.9  | <LOD  | <LOD  | 2.2  | <LOD  | 35   | 1.9   | 0.83 | 1.4  | 4.3    | 0.32     | <LOD | 0.58  | 22    | <0.24  | 0.41 | 0.10  | 0.016  | 0.044 | 0.36  | 0.024 |
| 1986          | 1081       | 928              | 3.1 | <LOD  | 3.4  | 9.1  | <LOD  | 0.26  | 3.6  | <LOD  | 24   | 3.0   | 1.4  | 1.9  | <LOD   | <LOD     | <LOD | 0.61  | 27    | <LOD   | 0.23 | 0.14  | <LOD   | <LOD  | 0.31  | 0.023 |
| 1985          | 1103       | 671              | 4.6 | <LOD  | 3.3  | 3.5  | <LOD  | 0.19  | 2.5  | <LOD  | 12   | 2.4   | 1.1  | 0.90 | <LOD   | 0.34     | <LOD | 0.36  | 11    | <LOD   | 0.20 | 0.11  | 0.024  | 0.024 | 0.18  | 0.024 |
| 1984          | 1137       | 1175             | 4.2 | <LOD  | 2.9  | 3.7  | <LOD  | 0.20  | 2.5  | <LOD  | 11   | 2.4   | 1.1  | 1.4  | <LOD   | <LOD     | <LOD | 0.36  | 16    | <LOD   | 0.24 | 0.100 | 0.025  | 0.025 | 0.25  | 0.019 |
| 1983          | 1168       | 1116             | 3.2 | <LOD  | 2.7  | 6.6  | <LOD  | 0.24  | 2.6  | <LOD  | 19   | 2.3   | 0.94 | 1.6  | <LOD   | <LOD     | <LOD | 0.32  | 29    | <LOD   | 0.32 | 0.15  | <LOD   | <LOD  | 0.28  | 0.029 |
| 1982          | 1197       | 1032             | 3.0 | <LOD  | 3.0  | 6.3  | <LOD  | 0.080 | 3.0  | <LOD  | 25   | 1.6   | 0.91 | 1.2  | <LOD   | <LOD     | <LOD | 0.31  | 15    | <LOD   | 0.19 | 0.11  | <LOD   | <LOD  | 0.23  | 0.009 |
| 1981          | 1235       | 1302             | 4.5 | <LOD  | 1.8  | 6.4  | <LOD  | <LOD  | 1.9  | <LOD  | 30   | 1.8   | 1.0  | 1.1  | <LOD   | 0.14     | <LOD | 0.41  | 12    | <LOD   | 0.28 | 0.079 | <LOD   | <LOD  | 0.23  | 0.015 |
| 1980          | 1276       | 1507             | 3.6 | 0.17  | 2.0  | 7.1  | <LOD  | <LOD  | 3.5  | <LOD  | 83   | 2.1   | 1.2  | 2.0  | <LOD   | 0.23     | <LOD | 0.70  | 16    | <LOD   | 0.34 | 0.087 | <LOD   | <LOD  | 0.25  | 0.019 |
| 1979          | 1300       | 804              | 4.8 | <LOD  | 2.5  | 8.4  | <LOD  | 0.13  | 2.6  | <LOD  | 16   | 2.7   | 1.2  | 1.6  | <LOD   | <LOD     | <LOD | <LOD  | 21    | <LOD   | 0.27 | 0.27  | <LOD   | <LOD  | 0.27  | 0.009 |
| 1978          | 1316       | 543              | 1.6 | <LOD  | 3.2  | 1.3  | <LOD  | <LOD  | 1.3  | <LOD  | 9.8  | 1.2   | 0.55 | 0.43 | <LOD   | <LOD     | <LOD | 0.14  | 4.4   | <LOD   | 0.14 | 0.072 | <LOD   | <LOD  | <LOD  | 0.004 |
| 1977          | 1338       | 791              | 1.7 | <LOD  | 1.8  | 0.65 | <LOD  | <LOD  | 2.4  | <LOD  | 5.8  | 1.4   | 0.86 | 0.54 | <LOD   | <LOD     | <LOD | 0.23  | 4.1   | <LOD   | 0.15 | 0.070 | <LOD   | <LOD  | <LOD  | 0.010 |
| 1976          | 1361       | 852              | 3.2 | <LOD  | 4.9  | 15   | <LOD  | 0.19  | 4.0  | <LOD  | 38   | 2.1   | 2.2  | 3.4  | <LOD   | 0.80     | <LOD | 0.59  | 33    | <LOD   | 0.47 | 0.18  | <LOD   | <LOD  | 0.34  | 0.036 |
| 1975          | 1385       | 941              | 2.8 | <LOD  | 3.0  | 12   | <LOD  | 0.13  | 3.0  | 0.087 | 54   | 1.8   | 1.0  | 2.2  | <LOD   | 0.33     | <LOD | 0.56  | 28    | <LOD   | 0.22 | 0.37  | <LOD   | <LOD  | 0.62  | 0.019 |

**Table S8.** Correlation matrix for OPE concentrations in Devon Ice Cap core. Significant ( $p < 0.05$ ) correlations are in red. When Spearman correlation coefficient ( $R_s$ )  $> 0.70$ , cell is shaded and  $R_s > 0.80$  is in bold and outlined. Excluded are substances with detection frequencies  $< 50\%$ : TBPO, TDBPP, DOPP, TEHP, TTBP, TBDPP.

|        |         | TEP<br>36 | TnBP<br>36 | TiBP<br>36 | TPPO<br>36 | TCEP<br>36 | TEEDP<br>25 | TCPP<br>36 | TDCPP<br>36 | TPP<br>36 | EHDP<br>36 | TOTP<br>36 | iDeDPP<br>36 | TBOEP<br>36 | TXP<br>30 | DTBPPP<br>30 | T2iPPP<br>31 |
|--------|---------|-----------|------------|------------|------------|------------|-------------|------------|-------------|-----------|------------|------------|--------------|-------------|-----------|--------------|--------------|
| TEP    | Rs      | 1.00      | 0.60       | 0.61       | 0.28       | 0.61       | 0.12        | 0.54       | 0.43        | 0.34      | 0.31       | 0.57       | 0.59         | 0.50        | 0.01      | 0.20         | 0.25         |
|        | p-value | --        | 1.E-04     | 9.E-05     | 0.10       | 7.E-05     | 0.58        | 8.E-04     | 9.E-03      | 0.04      | 0.07       | 3.E-04     | 2.E-04       | 2.E-03      | 0.98      | 0.30         | 0.18         |
| TnBP   | RS      | 0.60      | 1.00       | 0.75       | 0.34       | 0.91       | 0.25        | 0.61       | 0.70        | 0.40      | 0.41       | 0.73       | 0.74         | 0.41        | -0.01     | 0.33         | 0.31         |
|        | p-value | 1.E-04    | --         | 1.E-07     | 0.04       | 7.E-15     | 0.23        | 8.E-05     | 2.E-06      | 0.02      | 0.01       | 5.E-07     | 3.E-07       | 0.01        | 0.97      | 0.07         | 0.09         |
| TiBP   | RS      | 0.61      | 0.75       | 1.00       | 0.38       | 0.69       | 0.26        | 0.46       | 0.54        | 0.27      | 0.28       | 0.49       | 0.68         | 0.40        | 0.03      | 0.32         | 0.23         |
|        | p-value | 9.E-05    | 1.E-07     | --         | 0.02       | 3.E-06     | 0.22        | 5.E-03     | 6.E-04      | 0.11      | 0.09       | 2.E-03     | 6.E-06       | 0.01        | 0.87      | 0.09         | 0.21         |
| TPPO   | RS      | 0.28      | 0.34       | 0.38       | 1.00       | 0.53       | -0.23       | 0.40       | 0.29        | 0.25      | 0.60       | 0.32       | 0.37         | 0.07        | -0.04     | 0.15         | 0.12         |
|        | p-value | 0.10      | 0.04       | 0.02       | --         | 1.E-03     | 0.27        | 0.02       | 0.08        | 0.14      | 1.E-04     | 0.06       | 0.03         | 0.67        | 0.84      | 0.42         | 0.53         |
| TCEP   | RS      | 0.61      | 0.91       | 0.69       | 0.53       | 1.00       | 0.16        | 0.67       | 0.69        | 0.45      | 0.59       | 0.75       | 0.78         | 0.42        | 0.07      | 0.39         | 0.37         |
|        | p-value | 7.E-05    | 7.E-15     | 3.E-06     | 1.E-03     | --         | 0.45        | 7.E-06     | 3.E-06      | 0.01      | 1.E-04     | 2.E-07     | 2.E-08       | 0.01        | 0.70      | 0.03         | 0.04         |
| TEEDP  | RS      | 0.12      | 0.25       | 0.26       | -0.23      | 0.16       | 1.00        | 0.17       | 0.43        | 0.18      | -0.01      | 0.13       | 0.22         | 0.20        | 0.17      | 0.18         | 0.46         |
|        | p-value | 0.58      | 0.23       | 0.22       | 0.27       | 0.45       | --          | 0.41       | 0.03        | 0.38      | 0.95       | 0.53       | 0.30         | 0.34        | 0.45      | 0.42         | 0.04         |
| TCPP   | RS      | 0.54      | 0.61       | 0.46       | 0.40       | 0.67       | 0.17        | 1.00       | 0.49        | 0.74      | 0.50       | 0.63       | 0.56         | 0.24        | -0.09     | 0.27         | 0.64         |
|        | p-value | 8.E-04    | 8.E-05     | 5.E-03     | 0.02       | 7.E-06     | 0.41        | --         | 3.E-03      | 3.E-07    | 2.E-03     | 3.E-05     | 4.E-04       | 0.16        | 0.64      | 0.14         | 1.E-04       |
| TDCPP  | RS      | 0.43      | 0.70       | 0.54       | 0.29       | 0.69       | 0.43        | 0.49       | 1.00        | 0.35      | 0.35       | 0.66       | 0.53         | 0.52        | 0.03      | 0.33         | 0.36         |
|        | p-value | 9.E-03    | 2.E-06     | 6.E-04     | 0.08       | 3.E-06     | 0.03        | 3.E-03     | --          | 0.04      | 0.04       | 1.E-05     | 8.E-04       | 1.E-03      | 0.90      | 0.07         | 0.05         |
| TPP    | RS      | 0.34      | 0.40       | 0.27       | 0.25       | 0.45       | 0.18        | 0.74       | 0.35        | 1.00      | 0.39       | 0.38       | 0.42         | 0.07        | 0.00      | 0.16         | 0.83         |
|        | p-value | 0.04      | 0.02       | 0.11       | 0.14       | 6.E-03     | 0.38        | 3.E-07     | 0.04        | --        | 0.02       | 0.02       | 0.01         | 0.68        | 0.98      | 0.40         | 9.E-09       |
| EHDP   | RS      | 0.31      | 0.41       | 0.28       | 0.60       | 0.59       | -0.01       | 0.50       | 0.35        | 0.39      | 1.00       | 0.54       | 0.57         | 0.12        | -0.11     | 0.40         | 0.21         |
|        | p-value | 0.07      | 0.01       | 0.09       | 1.E-04     | 1.E-04     | 0.95        | 2.E-03     | 0.04        | 0.02      | --         | 7.E-04     | 3.E-04       | 0.47        | 0.56      | 0.03         | 0.27         |
| TOTP   | RS      | 0.57      | 0.73       | 0.49       | 0.32       | 0.75       | 0.13        | 0.63       | 0.66        | 0.38      | 0.54       | 1.00       | 0.69         | 0.36        | -0.06     | 0.42         | 0.39         |
|        | p-value | 3.E-04    | 5.E-07     | 2.E-03     | 0.06       | 2.E-07     | 0.53        | 3.E-05     | 1.E-05      | 0.02      | 7.E-04     | --         | 3.E-06       | 0.03        | 0.74      | 0.02         | 0.03         |
| iDeDPP | RS      | 0.59      | 0.74       | 0.68       | 0.37       | 0.78       | 0.22        | 0.56       | 0.53        | 0.42      | 0.57       | 0.69       | 1.00         | 0.23        | 0.00      | 0.32         | 0.31         |
|        | p-value | 2.E-04    | 3.E-07     | 6.E-06     | 0.03       | 2.E-08     | 0.30        | 4.E-04     | 8.E-04      | 0.01      | 3.E-04     | 3.E-06     | --           | 0.17        | 1.00      | 0.08         | 0.09         |
| TBOEP  | RS      | 0.50      | 0.41       | 0.40       | 0.07       | 0.42       | 0.20        | 0.24       | 0.52        | 0.07      | 0.12       | 0.36       | 0.23         | 1.00        | -0.02     | 0.23         | 0.15         |
|        | p-value | 2.E-03    | 0.01       | 0.01       | 0.67       | 0.01       | 0.34        | 0.16       | 1.E-03      | 0.68      | 0.47       | 0.03       | 0.17         | --          | 0.93      | 0.22         | 0.43         |
| TXP    | RS      | 0.01      | -0.01      | 0.03       | -0.04      | 0.07       | 0.17        | -0.09      | 0.03        | 0.00      | -0.11      | -0.06      | 0.00         | -0.02       | 1.00      | 0.24         | 0.14         |
|        | p-value | 0.98      | 0.97       | 0.87       | 0.84       | 0.70       | 0.45        | 0.64       | 0.90        | 0.98      | 0.56       | 0.74       | 1.00         | 0.93        | --        | 0.24         | 0.49         |
| DTBPPP | RS      | 0.20      | 0.33       | 0.32       | 0.15       | 0.39       | 0.18        | 0.27       | 0.33        | 0.16      | 0.40       | 0.42       | 0.32         | 0.23        | 0.24      | 1.00         | 0.28         |
|        | p-value | 0.30      | 0.07       | 0.09       | 0.42       | 0.03       | 0.42        | 0.14       | 0.07        | 0.40      | 0.03       | 0.02       | 0.08         | 0.22        | 0.24      | --           | 0.17         |
| T2iPPP | RS      | 0.25      | 0.31       | 0.23       | 0.12       | 0.37       | 0.46        | 0.64       | 0.36        | 0.83      | 0.21       | 0.39       | 0.31         | 0.15        | 0.14      | 0.28         | 1.00         |
|        | p-value | 0.18      | 0.09       | 0.21       | 0.53       | 0.04       | 0.04        | 1.E-04     | 0.05        | 9.E-09    | 0.27       | 0.03       | 0.09         | 0.43        | 0.49      | 0.17         | --           |

**Table S9** Correlation matrix for OPE concentrations in Mt. Oxford core. Significant ( $p < 0.05$ ) correlations are in red. When Spearman correlation coefficient ( $R_s$ )  $> 0.70$ , cell is shaded and  $R_s > 0.80$  is in bold and outlined. Excluded are substances with detection frequencies  $< 50\%$ : TEEDP, TOTP, TXP.

|        |           | TEP    | TnBP   | TIBP   | TPPO   | TCEP   | TCPP   | TDCPP  | TPP    | EHDP   | IDEDPP | TBOEP  | TEHP   | DTBPPP | T2iPPP | TBDPP  | DIPI   |
|--------|-----------|--------|--------|--------|--------|--------|--------|--------|--------|--------|--------|--------|--------|--------|--------|--------|--------|
|        | # Detects | 41     | 43     | 43     | 35     | 42     | 43     | 43     | 43     | 43     | 42     | 43     | 43     | 43     | 22     | 38     | 42     |
| TEP    | RS        | 1.00   | 0.20   | 0.27   | 0.14   | 0.30   | 0.21   | 0.44   | 0.48   | 0.32   | 0.49   | 0.35   | 0.34   | 0.41   | -0.25  | 0.24   | 0.45   |
|        | p-value   | --     | 0.21   | 0.09   | 0.38   | 0.09   | 0.18   | 4.E-03 | 1.E-03 | 0.04   | 1.E-03 | 0.02   | 0.03   | 0.01   | 0.29   | 0.17   | 4.E-03 |
| TnBP   | RS        | 0.20   | 1.00   | 0.26   | 0.09   | 0.07   | 0.04   | 0.23   | 0.33   | 0.28   | 0.23   | 0.29   | 0.11   | 0.53   | 0.22   | 0.44   | 0.26   |
|        | p-value   | 0.21   | --     | 0.09   | 0.56   | 0.70   | 0.80   | 0.13   | 0.03   | 0.06   | 0.14   | 0.06   | 0.49   | 3.E-04 | 0.33   | 0.01   | 0.09   |
| TIBP   | RS        | 0.27   | 0.26   | 1.00   | 0.33   | 0.24   | 0.61   | 0.52   | 0.63   | 0.86   | 0.61   | 0.86   | 0.65   | 0.71   | 0.20   | 0.63   | 0.60   |
|        | p-value   | 0.09   | 0.09   | --     | 0.03   | 0.17   | 1.E-05 | 3.E-04 | 6.E-06 | 1.E-13 | 2.E-05 | 2.E-13 | 2.E-06 | 1.E-07 | 0.37   | 2.E-05 | 2.E-05 |
| TPPO   | RS        | 0.14   | 0.09   | 0.33   | 1.00   | 1.00   | 0.13   | 0.49   | 0.34   | 0.46   | 0.23   | 0.35   | 0.35   | 0.32   | 0.03   | 0.07   | 0.33   |
|        | p-value   | 0.38   | 0.56   | 0.03   | --     | --     | 0.42   | 7.E-04 | 0.03   | 2.E-03 | 0.15   | 0.02   | 0.02   | 0.03   | 0.88   | 0.66   | 0.03   |
| TCEP   | RS        | 0.30   | 0.07   | 0.24   | 1.00   | 1.00   | 0.20   | 0.48   | 0.38   | 0.49   | 0.31   | 0.33   | 0.33   | 0.20   | 0.02   | 0.08   | 0.41   |
|        | p-value   | 0.09   | 0.70   | 0.17   | --     | --     | 0.26   | 3.E-03 | 0.02   | 3.E-03 | 0.07   | 0.05   | 0.05   | 0.25   | 0.95   | 0.68   | 0.02   |
| TCPP   | RS        | 0.21   | 0.04   | 0.61   | 0.13   | 0.20   | 1.00   | 0.46   | 0.63   | 0.69   | 0.73   | 0.62   | 0.70   | 0.52   | 0.45   | 0.58   | 0.60   |
|        | p-value   | 0.18   | 0.80   | 1.E-05 | 0.42   | 0.26   | --     | 2.E-03 | 6.E-06 | 3.E-07 | 3.E-08 | 9.E-06 | 2.E-07 | 4.E-04 | 0.03   | 1.E-04 | 3.E-05 |
| TDCPP  | RS        | 0.44   | 0.23   | 0.52   | 0.49   | 0.48   | 0.46   | 1.00   | 0.65   | 0.57   | 0.58   | 0.52   | 0.59   | 0.56   | 0.53   | 0.47   | 0.63   |
|        | p-value   | 4.E-03 | 0.13   | 3.E-04 | 7.E-04 | 3.E-03 | 2.E-03 | --     | 3.E-06 | 7.E-05 | 5.E-05 | 4.E-04 | 4.E-05 | 9.E-05 | 1.E-02 | 3.E-03 | 7.E-06 |
| TPP    | RS        | 0.48   | 0.33   | 0.63   | 0.34   | 0.38   | 0.63   | 0.65   | 1.00   | 0.73   | 0.87   | 0.62   | 0.72   | 0.61   | 0.41   | 0.64   | 0.83   |
|        | p-value   | 1.E-03 | 0.03   | 6.E-06 | 0.03   | 0.02   | 6.E-06 | 3.E-06 | --     | 3.E-08 | 1.E-13 | 1.E-05 | 4.E-08 | 2.E-05 | 0.06   | 1.E-05 | 2.E-11 |
| EHDP   | RS        | 0.32   | 0.28   | 0.86   | 0.46   | 0.49   | 0.69   | 0.57   | 0.73   | 1.00   | 0.76   | 0.85   | 0.73   | 0.74   | 0.22   | 0.72   | 0.72   |
|        | p-value   | 0.04   | 0.06   | 1.E-13 | 2.E-03 | 3.E-03 | 3.E-07 | 7.E-05 | 3.E-08 | --     | 6.E-09 | 6.E-13 | 3.E-08 | 2.E-08 | 3.E-01 | 4.E-07 | 9.E-08 |
| IDEDPP | RS        | 0.49   | 0.23   | 0.61   | 0.23   | 0.31   | 0.73   | 0.58   | 0.87   | 0.76   | 1.00   | 0.68   | 0.77   | 0.64   | 0.33   | 0.70   | 0.78   |
|        | p-value   | 1.E-03 | 0.14   | 2.E-05 | 0.15   | 0.07   | 3.E-08 | 5.E-05 | 1.E-13 | 6.E-09 | --     | 8.E-07 | 2.E-09 | 4.E-06 | 0.13   | 1.E-06 | 2.E-09 |
| TBOEP  | RS        | 0.35   | 0.29   | 0.86   | 0.35   | 0.33   | 0.62   | 0.52   | 0.62   | 0.85   | 0.68   | 1.00   | 0.70   | 0.72   | 0.22   | 0.76   | 0.70   |
|        | p-value   | 0.02   | 0.06   | 2.E-13 | 0.02   | 0.05   | 9.E-06 | 4.E-04 | 1.E-05 | 6.E-13 | 8.E-07 | --     | 2.E-07 | 5.E-08 | 0.32   | 4.E-08 | 3.E-07 |
| TEHP   | RS        | 0.34   | 0.11   | 0.65   | 0.35   | 0.33   | 0.70   | 0.59   | 0.72   | 0.73   | 0.77   | 0.70   | 1.00   | 0.53   | 0.37   | 0.59   | 0.76   |
|        | p-value   | 0.03   | 0.49   | 2.E-06 | 0.02   | 0.05   | 2.E-07 | 4.E-05 | 4.E-08 | 3.E-08 | 2.E-09 | 2.E-07 | --     | 2.E-04 | 0.09   | 9.E-05 | 4.E-09 |
| DTBPPP | RS        | 0.41   | 0.53   | 0.71   | 0.32   | 0.20   | 0.52   | 0.56   | 0.61   | 0.74   | 0.64   | 0.72   | 0.53   | 1.00   | 0.31   | 0.65   | 0.55   |
|        | p-value   | 0.01   | 3.E-04 | 1.E-07 | 0.03   | 0.25   | 4.E-04 | 9.E-05 | 2.E-05 | 2.E-08 | 4.E-06 | 5.E-08 | 2.E-04 | --     | 0.16   | 1.E-05 | 2.E-04 |
| T2iPPP | RS        | -0.25  | 0.22   | 0.20   | 0.03   | 0.02   | 0.45   | 0.53   | 0.41   | 0.22   | 0.33   | 0.22   | 0.37   | 0.31   | 1.00   | 0.29   | 0.38   |
|        | p-value   | 0.29   | 0.33   | 0.37   | 0.88   | 0.95   | 0.03   | 0.01   | 0.06   | 0.33   | 0.13   | 0.32   | 0.09   | 0.16   | --     | 0.19   | 0.08   |
| TBDPP  | RS        | 0.24   | 0.44   | 0.63   | 0.07   | 0.08   | 0.58   | 0.47   | 0.64   | 0.72   | 0.70   | 0.76   | 0.59   | 0.65   | 0.29   | 1.00   | 0.68   |
|        | p-value   | 0.17   | 0.01   | 2.E-05 | 0.66   | 0.68   | 1.E-04 | 3.E-03 | 1.E-05 | 4.E-07 | 1.E-06 | 4.E-08 | 9.E-05 | 1.E-05 | 0.19   | --     | 3.E-06 |
| DIPI   | RS        | 0.45   | 0.26   | 0.60   | 0.33   | 0.41   | 0.60   | 0.63   | 0.83   | 0.72   | 0.78   | 0.70   | 0.76   | 0.55   | 0.38   | 0.68   | 1.00   |
|        | p-value   | 4.E-03 | 0.09   | 2.E-05 | 0.03   | 0.02   | 3.E-05 | 7.E-06 | 2.E-11 | 9.E-08 | 2.E-09 | 3.E-07 | 4.E-09 | 2.E-04 | 0.08   | 3.E-06 | --     |

**Table S10.** Temporal trend for deposition of OPEs in Devon Ice Cap based on natural logarithm of flux versus year for 1979-2015. Doubling time was calculated for those OPEs which displayed first order kinetics ( $p < 0.05$ ).

| OPE                                         | R <sup>2</sup> | Degrees of freedom | Slope ± standard error (y <sup>-1</sup> ) | p-value                | Doubling time ± standard error (y) |
|---------------------------------------------|----------------|--------------------|-------------------------------------------|------------------------|------------------------------------|
| <b>Devon Ice Cap, first order kinetics*</b> |                |                    |                                           |                        |                                    |
| TEP                                         | 0.286          | 35                 | 0.036 ± 0.010                             | 0.0008                 | 19 ± 5.2                           |
| TnBP                                        | 0.587          | 35                 | 0.043 ± 0.0062                            | 5.1 × 10 <sup>-8</sup> | 16 ± 2.3                           |
| TiBP                                        | 0.311          | 35                 | 0.026 ± 0.0066                            | 0.0004                 | 27 ± 6.8                           |
| TCEP                                        | 0.519          | 35                 | 0.040 ± 0.0065                            | 7.2 × 10 <sup>-7</sup> | 18 ± 2.9                           |
| TCPP                                        | 0.342          | 35                 | 0.064 ± 0.015                             | 0.0002                 | 11 ± 2.6                           |
| TDCPP                                       | 0.289          | 35                 | 0.030 ± 0.0081                            | 0.0007                 | 23 ± 6.2                           |
| TPP                                         | 0.163          | 35                 | 0.041 ± 0.016                             | 0.015                  | 17 ± 6.6                           |
| iDeDPP                                      | 0.637          | 35                 | 0.068 ± 0.0088                            | 5.6 × 10 <sup>-9</sup> | 10 ± 1.3                           |
| TOTP                                        | 0.311          | 35                 | 0.036 ± 0.0093                            | 0.0004                 | 19 ± 4.9                           |
| T2iPPP                                      | 0.210          | 35                 | 0.044 ± 0.015                             | 0.0064                 | 16 ± 5.4                           |
| TPPO                                        | 0.0644         | 35                 | 0.022 ± 0.0145                            | 0.14                   |                                    |
| TBOEP                                       | 0.0949         | 35                 | 0.016 ± 0.0083                            | 0.068                  |                                    |
| EHDPP                                       | 0.0624         | 35                 | 0.012 ± 0.0082                            | 0.14                   |                                    |
| T35DMPP                                     | 0.0208         | 29                 | -0.013 ± 0.016                            | 0.45                   |                                    |
| DTBPPP                                      | 0.0185         | 35                 | 0.0098 ± 0.013                            | 0.44                   |                                    |

\* TPPO, TBOEP, EHDPP, TXP and DTBPP did not display first order kinetics in the Devon Ice Cap

**Table S11.** Correlation matrix for OPE concentrations and particle concentrations after log transformation. Significant ( $p < 0.05$ ) correlations in shaded cells. Excluded are substances with detection frequencies  $< 50\%$ : in Devon Ice Cap, these were TBPO, TDBPP, DOPP, TEHP, TTBPP, TBDPP and in the Mt. Oxford icefield these were TEEDP, TOTP, TXP. The particle concentrations are separated into size bins with partcnt2 corresponding to 2.4 to 4.5 micron and partcnt3 corresponding to 4.5 to 10 micron.

|                              |                | TEP    | TnBP    | TiBP  | TPPO   | TCEP    | TEEDP  | TCPP   | TDCPP  | TPhP  | EHDPP      | TOTP   | iDeDP<br>P | TBOEP  | T35D<br>MPP | TEHP    | DTBPPP | T2iPP<br>P |  |
|------------------------------|----------------|--------|---------|-------|--------|---------|--------|--------|--------|-------|------------|--------|------------|--------|-------------|---------|--------|------------|--|
| <b>a) Devon Ice Cap</b>      |                |        |         |       |        |         |        |        |        |       |            |        |            |        |             |         |        |            |  |
| measured<br>partcnt2,<br>ppm | R <sub>s</sub> | 0.26   | 0.50    | 0.31  | 0.054  | 0.51    | -0.11  | -0.047 | 0.28   | -0.17 | 0.27       | 0.11   | 0.44       | 0.12   | 0.06        | 0.17    | 0.00   | -0.21      |  |
|                              | p-value        | 0.073  | 0.0003  | 0.033 | 0.72   | 0.0002  | 0.55   | 0.75   | 0.053  | 0.25  | 0.069      | 0.44   | 0.0019     | 0.45   | 0.73        | 0.48    | 1.00   | 0.20       |  |
| measured<br>partcnt3,<br>ppm | R <sub>s</sub> | 0.25   | 0.54    | 0.32  | 0.11   | 0.55    | -0.100 | -0.057 | 0.28   | -0.14 | 0.31       | 0.13   | 0.50       | 0.11   | 0.02        | 0.03    | -0.09  | -0.23      |  |
|                              | p-value        | 0.092  | 0.0001  | 0.027 | 0.46   | 5E-04   | 0.58   | 0.70   | 0.053  | 0.36  | 0.032      | 0.37   | 0.0003     | 0.48   | 0.91        | 0.90    | 0.59   | 0.16       |  |
| <b>b) Oxford icefield</b>    |                |        |         |       |        |         |        |        |        |       |            |        |            |        |             |         |        |            |  |
|                              |                | TEP    | TnBP    | TiBP  | TPPO   | TCEP    | TCPP   | TDCPP  | TPhP   | EHDPP | iDeDP<br>P | TBOEP  | TEHP       | DTBPP  | T2iPPP      | TBDPP   | DIPI   |            |  |
| measured<br>partcnt2,<br>ppm | R <sub>s</sub> | 0.44   | 0.76    | 0.25  | -0.069 | 0.68    | 0.16   | 0.19   | 0.52   | 0.29  | 0.34       | 0.57   | 0.63       | 0.68   | 0.082       | 0.56    | 0.49   |            |  |
|                              | p-value        | 0.0032 | 5.1E-9  | 0.11  | 0.66   | 5.9E-7  | 0.30   | 0.22   | 4.3E-4 | 0.062 | 0.030      | 9.2E-5 | 8.61E-7    | 0.61   | 1.0E-4      | 9.3E-4  | 0.32   |            |  |
| measured<br>partcnt3,<br>ppm | R <sub>s</sub> | 0.52   | 0.80    | 0.29  | -0.063 | 0.80    | 0.25   | 0.30   | 0.54   | 0.33  | 0.43       | 0.65   | 0.71       | 0.69   | 0.14        | 0.58    | 0.51   |            |  |
|                              | p-value        | 3.8E-4 | 1.8E-10 | 0.063 | 0.69   | 3.0E-10 | 0.11   | 0.054  | 2.1E-4 | 0.031 | 0.0050     | 2.9E-6 | 1.2E-7     | 4.3E-7 | 0.36        | 6.0E-05 | 5.3E4  |            |  |

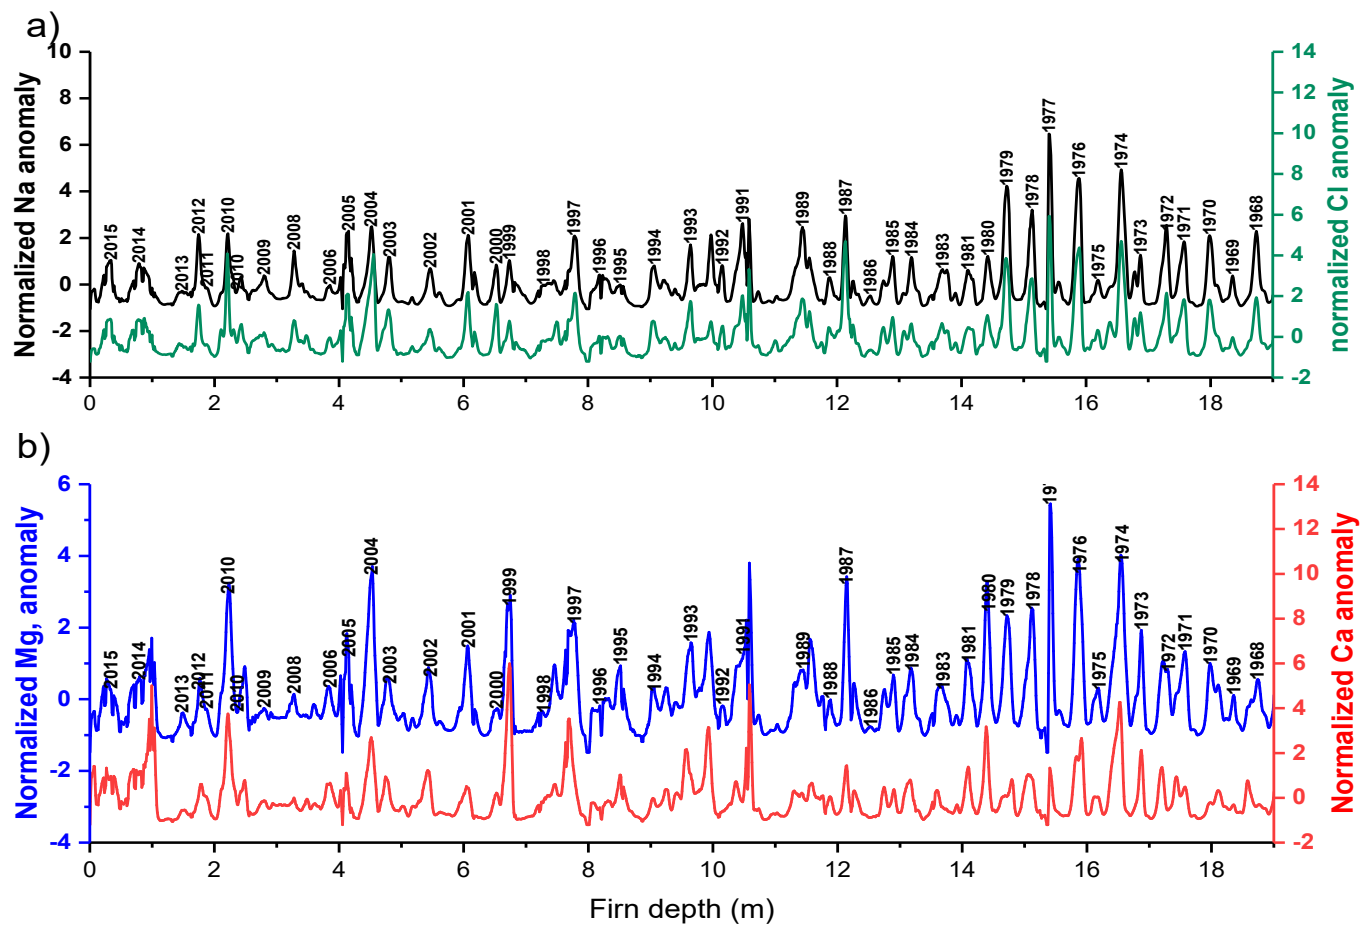

**Figure S1.** Major ions measured in 1 cm intervals in firn core, 0.5 cm to 19.165 cm depth in Devon Ice Cap ice core, expressed as normalized anomaly\* with labels corresponding to winter maxima year: a) sodium (Na), Chloride (Cl) and b) magnesium (Mg) and

Calcium (Ca). \* normalized anomaly =  $\frac{(X - \mu)}{\sigma}$  where X is data point,  $\mu$  and  $\sigma$  are average and standard deviation, respectively, for the entire length of the core. Three-point moving average smoother applied.

**a) Oxford**

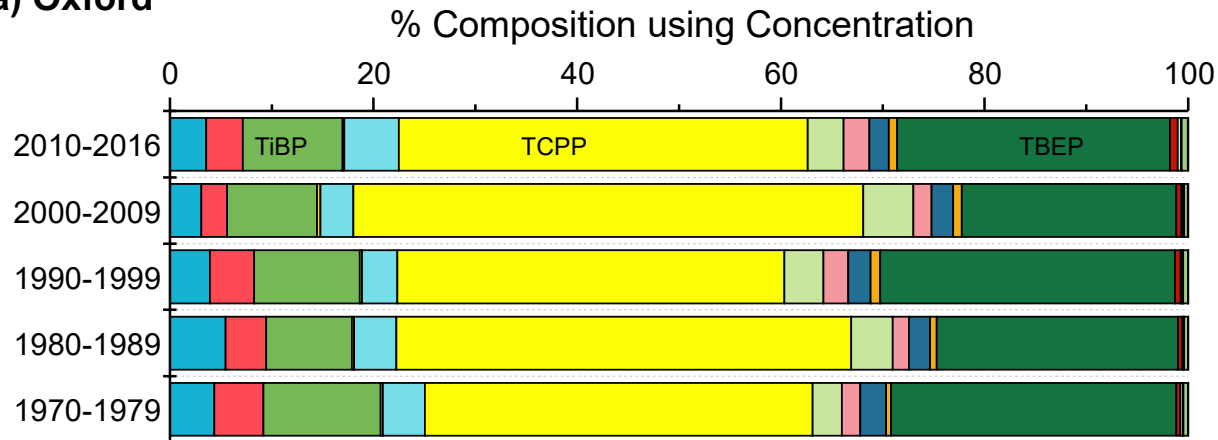

**b) Devon**

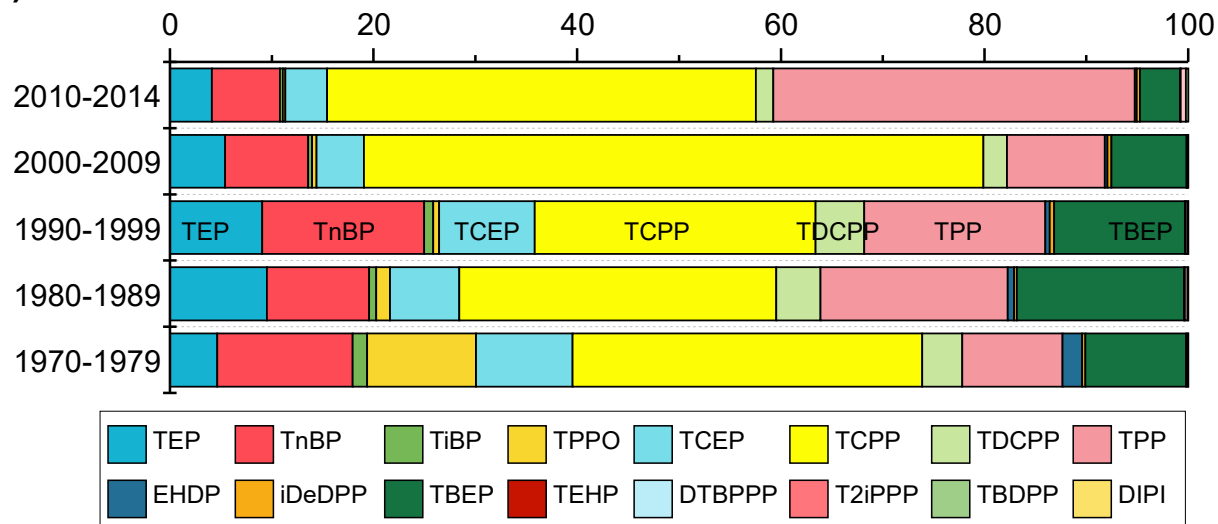

**Figure S2.** Multi-year binned composition of OPEs using concentration in ice cores from a) Mt. Oxford ice field and b) Devon Ice Cap.



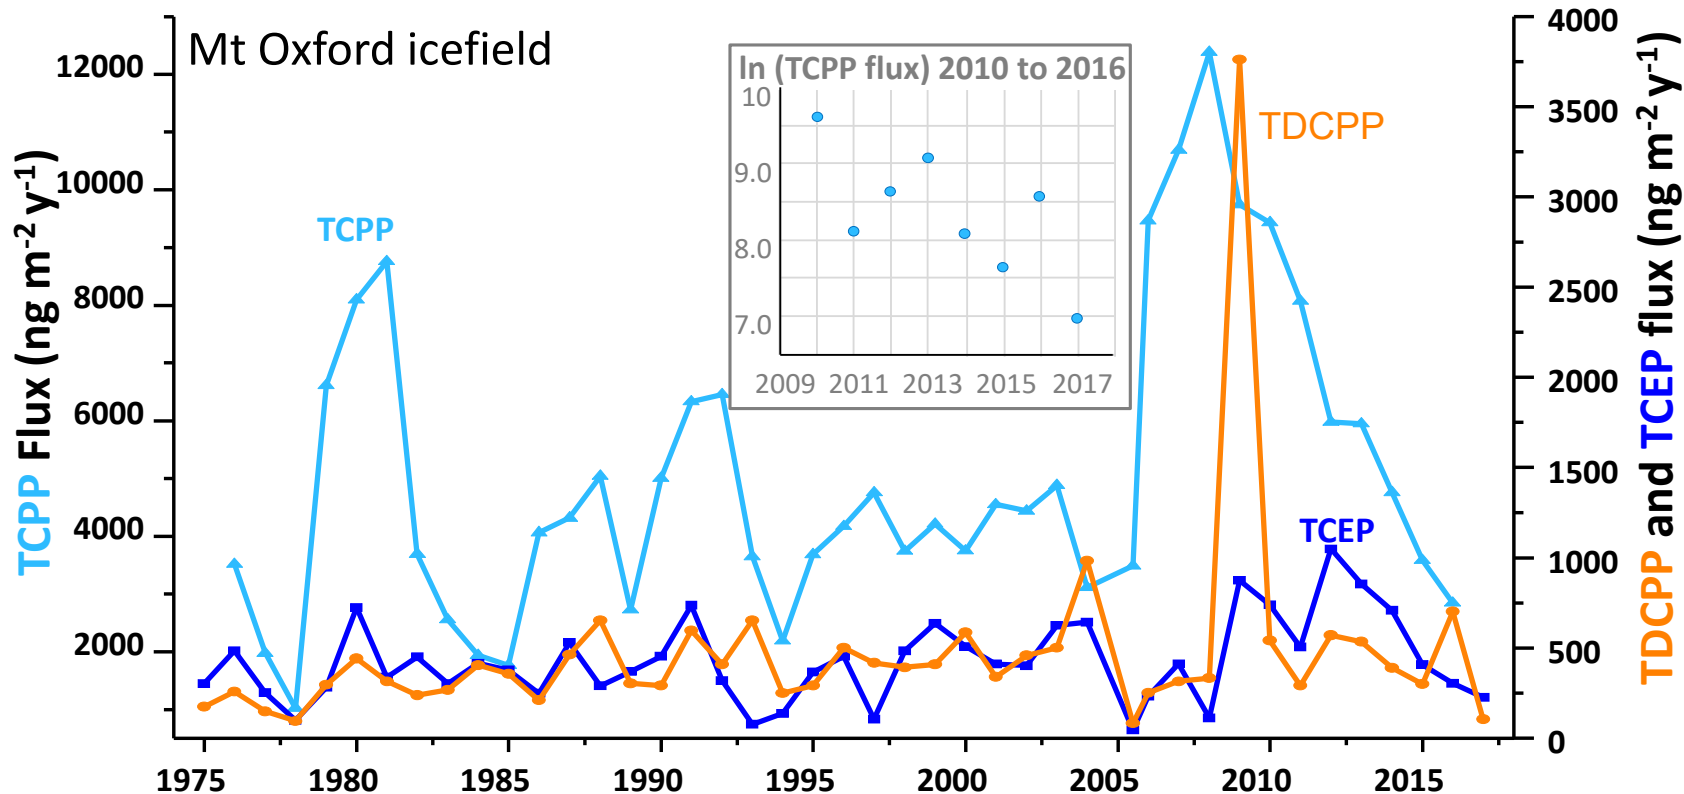

**Figure S3.** Annual flux ( $\text{ng m}^{-2}$ ) of TCPP, TCEP, and TDCPP in Mt. Oxford icefield core from 1975 to 2017. Magnitude of TCPP corresponds to left y-axis and TDCPP, TCEP to the right y-axis. Inset shows first order decline in TCPP flux from 2010 to 2017, elimination half-life of  $2.9 \pm 1.2 \text{ y}$  ( $r^2 = 0.51$ ,  $p = 0.047$ ). Note: Measurement in 2017 is 5.5 months of accumulation and not a full year.

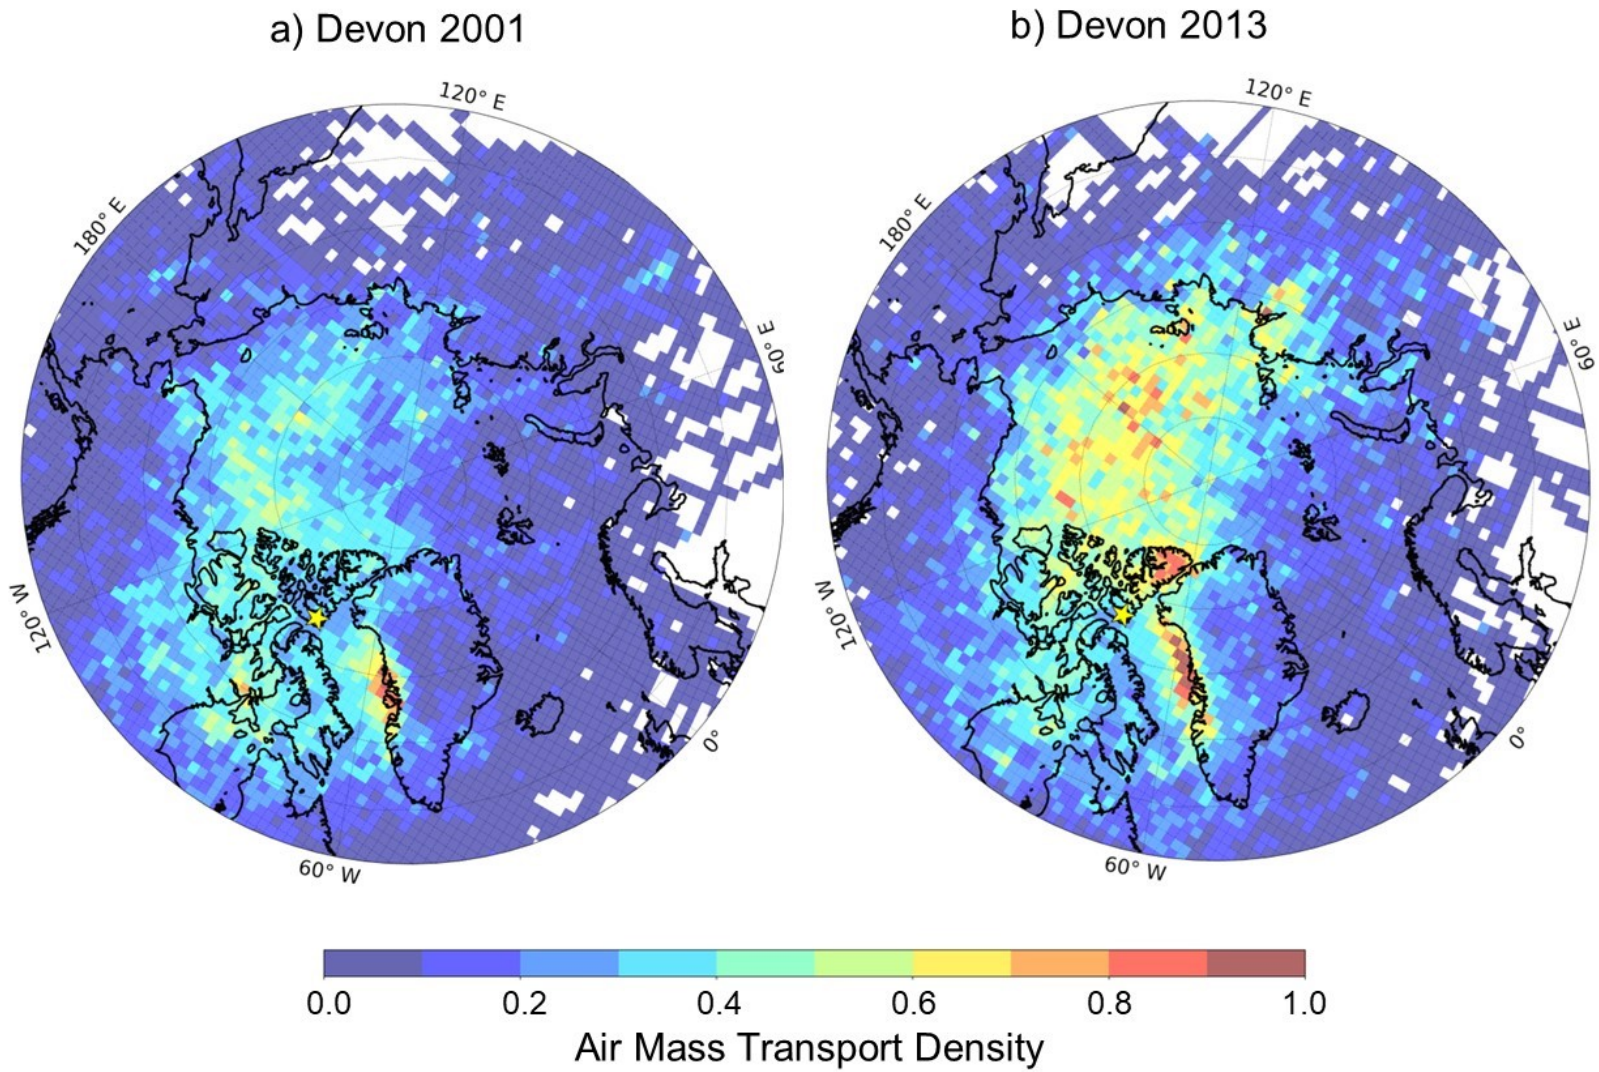

**Figure S4.** Air mass density back trajectory for Devon Ice Cap (star) for a) 2001 and b) 2013.

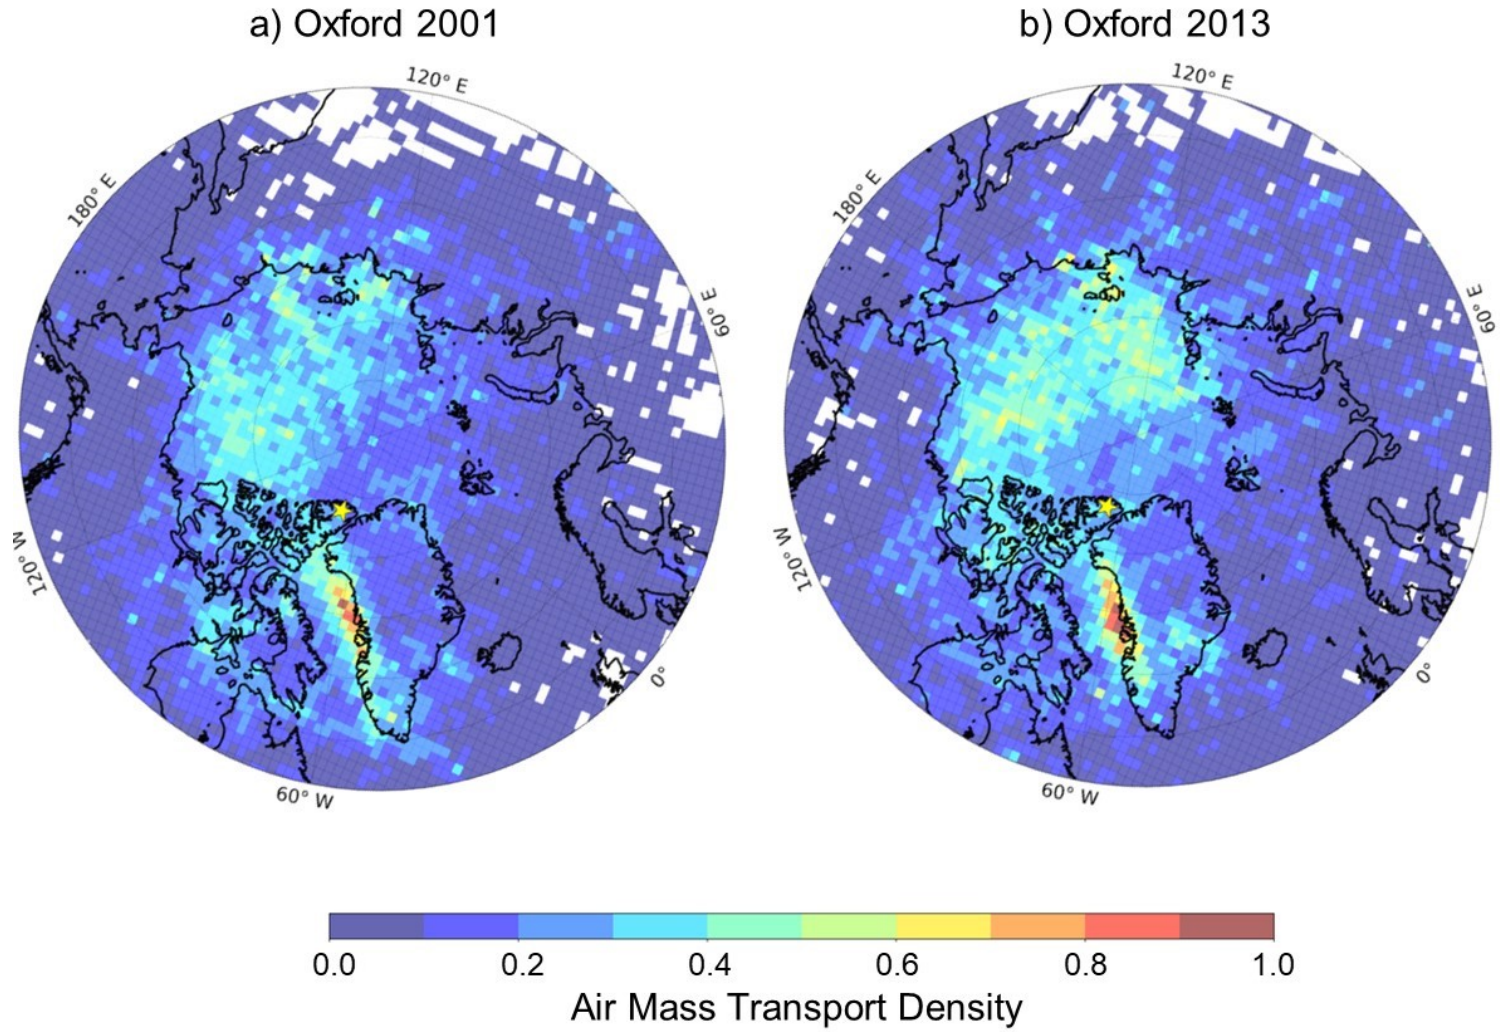

**Figure S5.** Air mass density back trajectory for Mt. Oxford icefield (star) for a) 2001 and b) 2013.

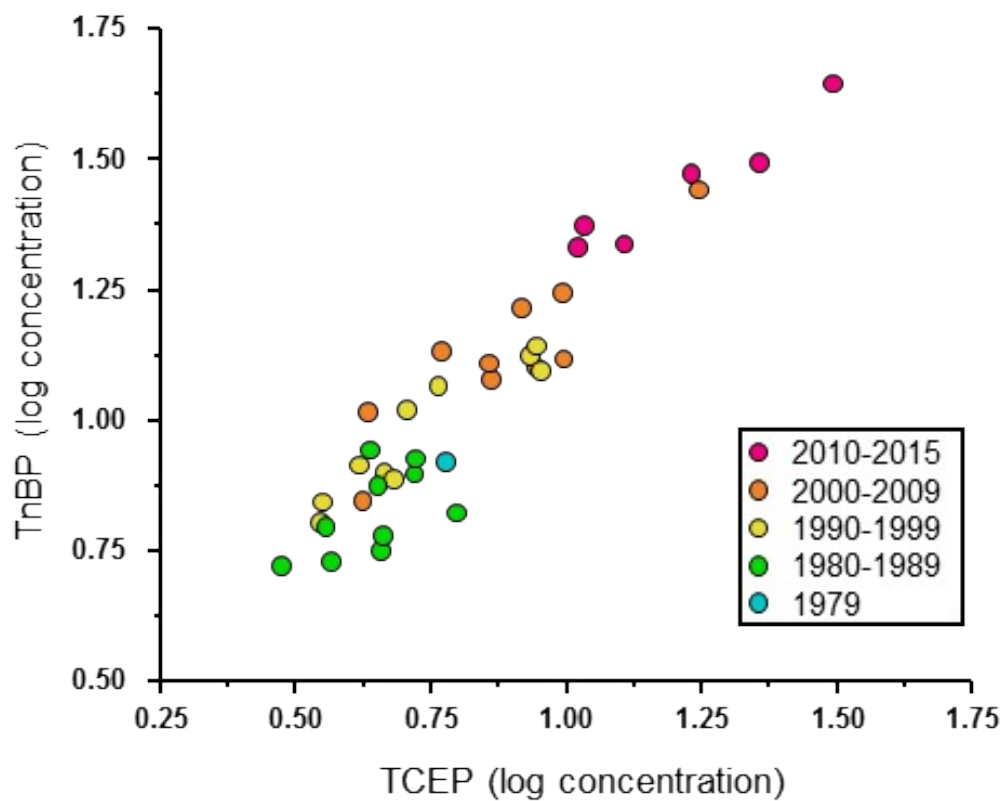

**Figure S6.** Correlation between log transformed concentrations of tributylphosphate (TnBP) and trichloroethylphosphate (TCEP) in Devon Ice Cap with colour shading corresponding to decade. Spearman correlation coefficient,  $R_S = 0.90$  and  $p < 0.001$ .

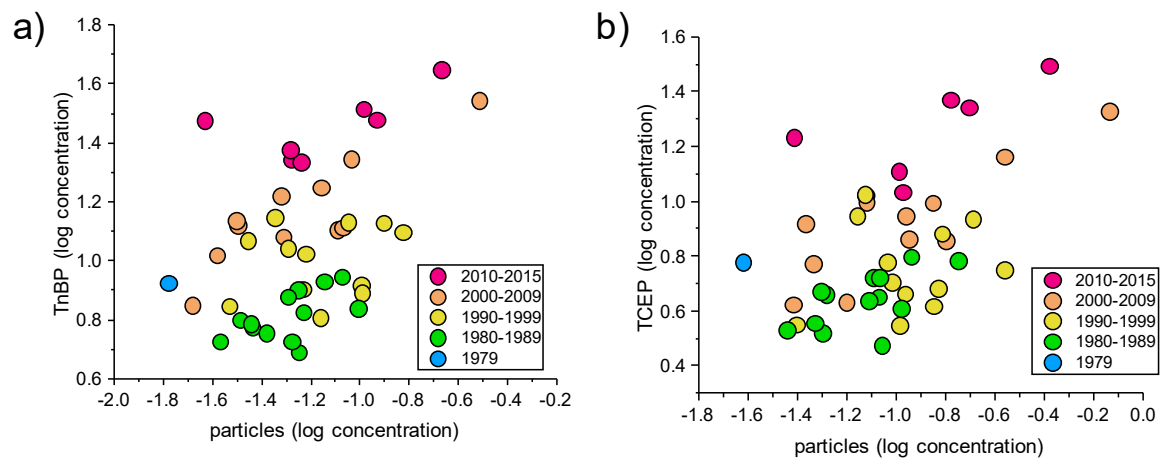

**Figure S7** Correlation of log transformed a) tri-*n*-butyl phosphate ( $\text{ng L}^{-1}$  TnBP);  $R_S = 0.54$ ,  $p=6.8\text{E-}5$  and b) trichloroethyl phosphate ( $\text{ng L}^{-1}$  TCEP);  $R_S = 0.55$ ,  $p= 4.5\text{E-}5$  with particle concentration ( $\mu\text{g ml}^{-1}$ ) in dated ice core sections from the Devon Ice Cap.

## References cited in Supplementary Information

- Hermanson, MH, Isaksson, E., Teixeira, C., Muir, D.C.G., Compher, K.M., Li, Y-F., Igarashi, M., Kamiyama, K. 2005. Current-Use and Legacy Pesticide History in the Austfonna Ice Cap, Svalbard, Norway. *Environ. Sci. Technol.* 39, 21, 8163-8169.
- Zhang, X., Meyer, T., Muir, D.C.G., Teixeira, C., Wang, X., Wania, F. 2013. Atmospheric deposition of current use pesticides in the Arctic: Snow core records from the Devon Island Ice Cap, Nunavut, Canada. *Environ. Sci.: Processes Impacts*, 15, 2304-2311
- Hartz, WF., Björnsdotter, M.K., Yeung, L.W.Y., Hodson, A., Thomas, E.R., Humby, J.D., Day, C., Ericson Jogsten, I., Kärrman, A., Kallenborn, R. 2023. Levels and distribution profiles of Per- and Polyfluoroalkyl Substances (PFAS) in a high Arctic Svalbard ice core, *Sci. Tot. Environ.* 871, 161830.
- Villa, S., Vighi, M., Maggi, V., Finizio, A., Bolzacchini, E. 2003. Historical trends of organochlorine pesticides in an alpine glacier. *J. Atmos. Chem.* 46, 295-311
- McConnell, J.R., Lamorey, G.W., Hutterli, M.A. 2002. A 250-year high-resolution record of Pb flux and crustal enrichment in central Greenland. *Geophysical Research Letters*, 29(23):2130.
- Liu, K., Wang, C., Hou, S., Wu, S-Y, Pang, H., Zhang, W., Wang, Y., Schwikowski, M., Jenk, T.M., Zou, X., Yu, J., An, C., Song, J. 2023. A high-resolution refractory black carbon (rBC) record since 1932 deduced from the Chongce ice core, Tibetan plateau, *Atmospheric Environment*, 294: 119480.

Potocki, M., Dixon, D.A., Kurbatov, A., Casassa, G., Zamora, R., Handley, M.J., Introne, D., Grigholm, B., Korotkikh, E.V., Birkel, S.D., Clifford, H., Mayewski, P.A. 2022. Trace metal emission history captured in a Chilean ice core. *Atmospheric Environment*, 276, 119002.
